# Supplementary material
Source: MDPI journal article supplement (https://www.mdpi.com/2075-163X/11/9/1011)

Sample 1

mean =  $96.07 \pm 0.54$  | 0.90 | 2.97 Ma (n=22/27)

MSWD = 10.0,  $p(\chi^2) = 0$

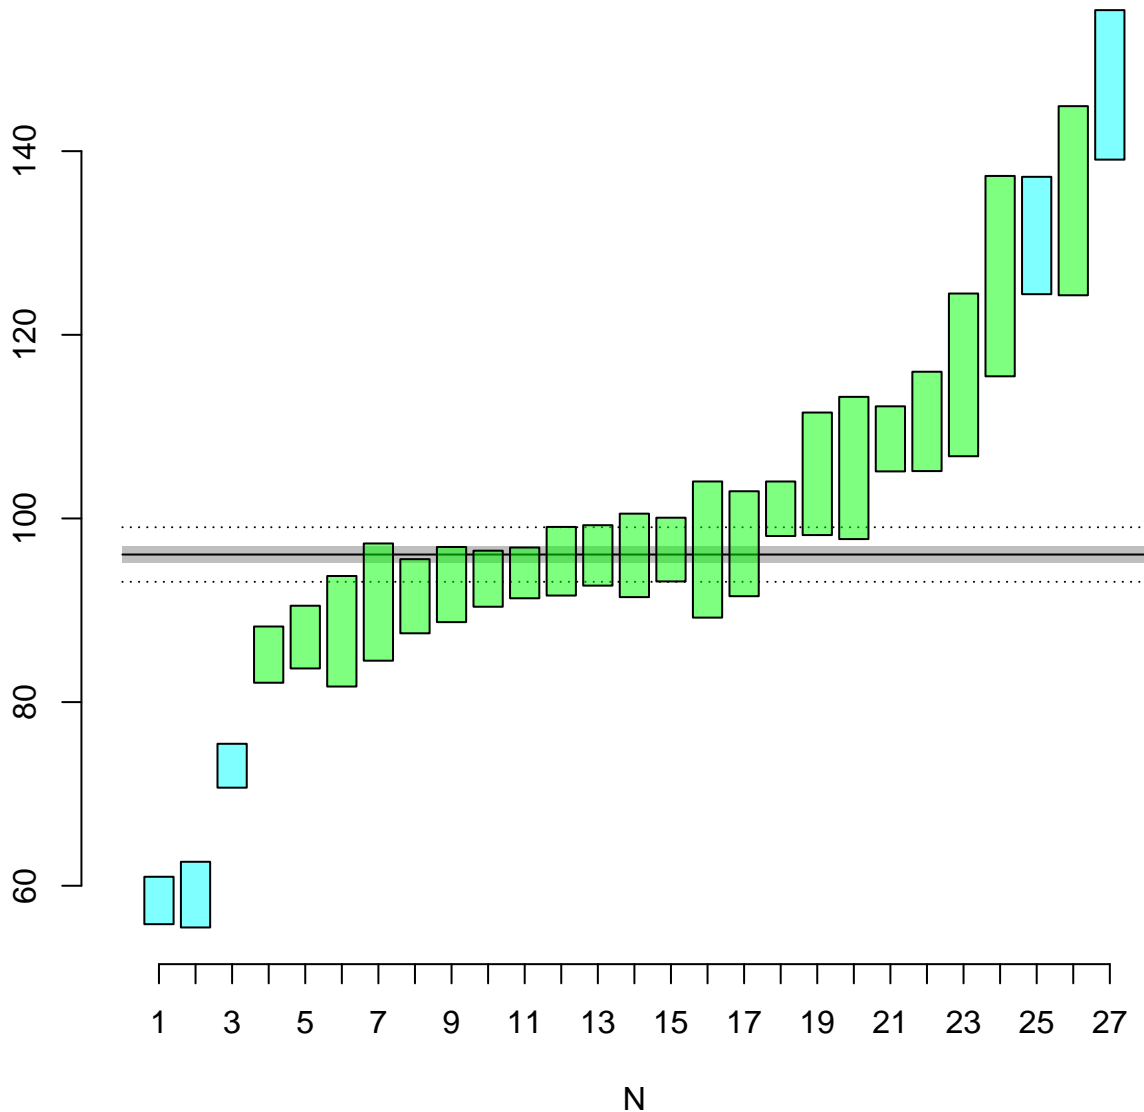

Sample 2

mean =  $97.09 \pm 1.13$  | 1.86 | 4.61 Ma (n=5/5)

MSWD = 3.67,  $p(\chi^2) = 0.0054$

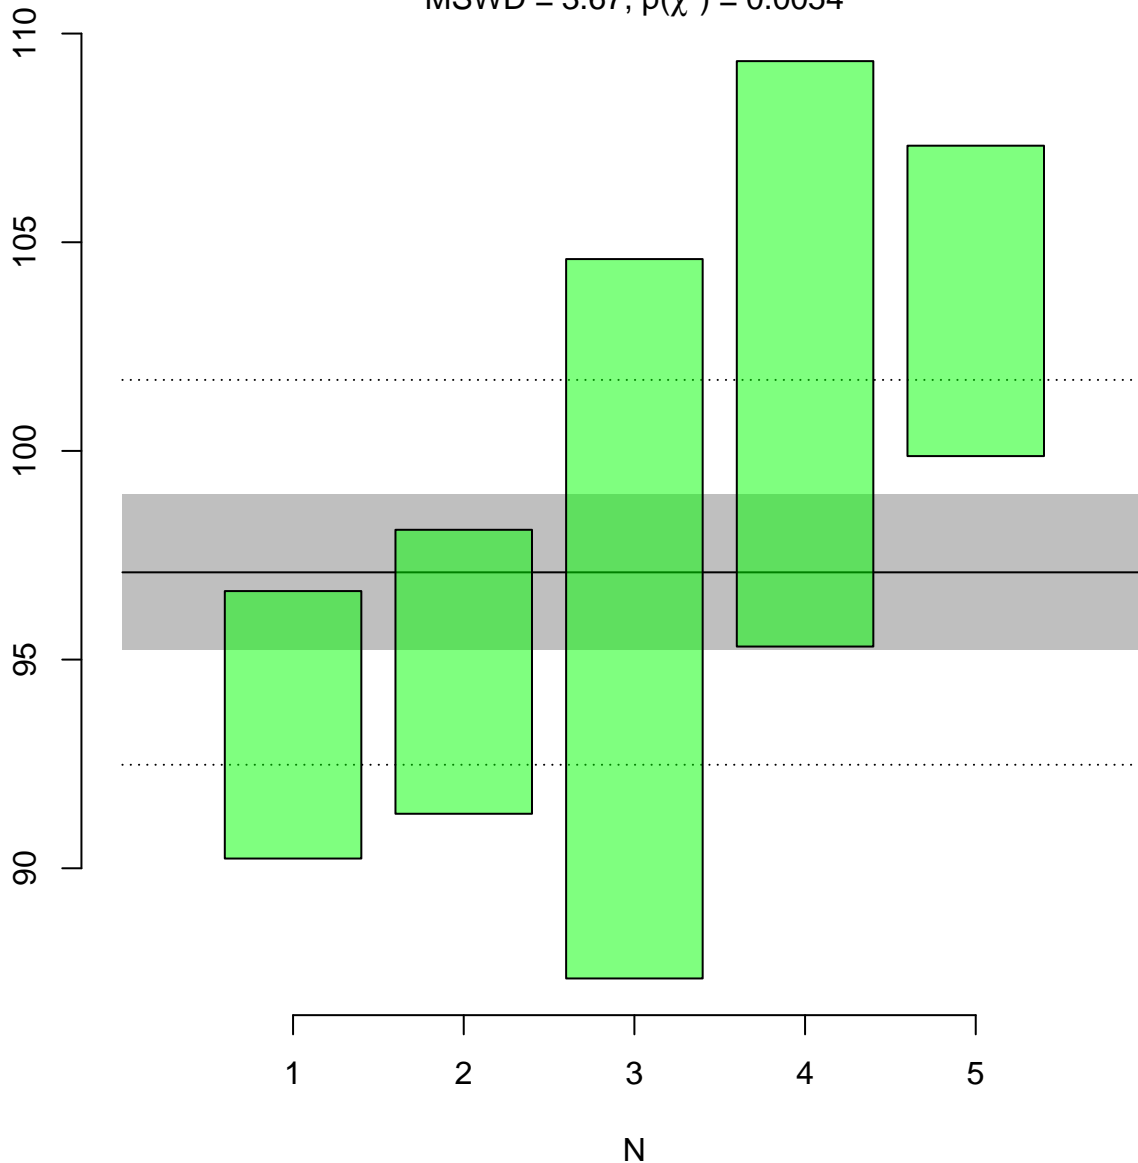

Sample 3

mean =  $93.05 \pm 1.10$  | 1.81 | 3.56 Ma (n=5/5)

MSWD = 2.30,  $p(\chi^2) = 0.057$

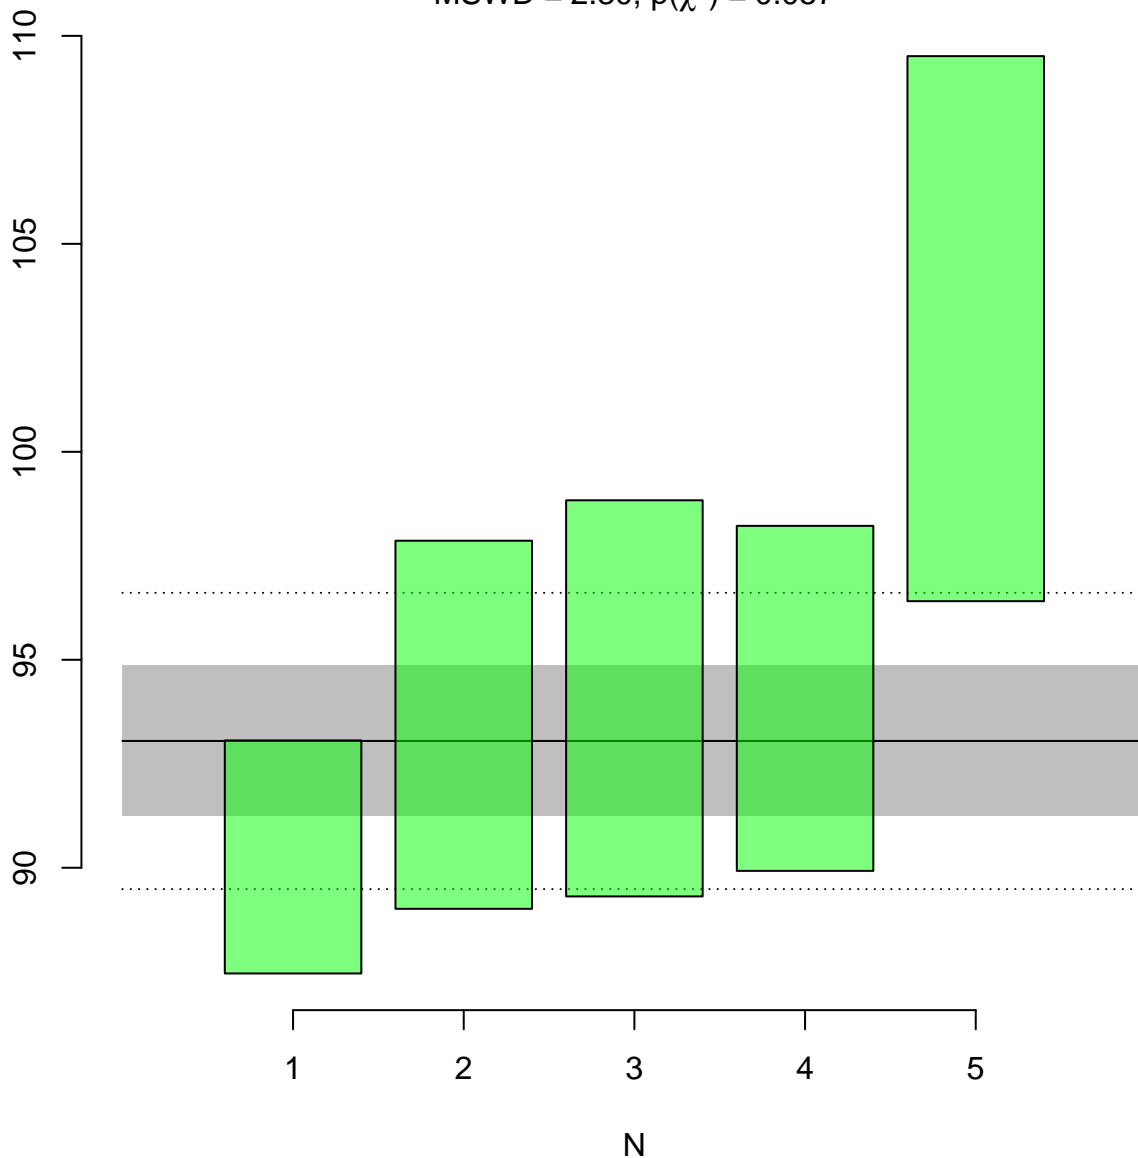

Sample 4

mean =  $90.36 \pm 0.67$  | 1.10 | 4.67 Ma (n=15/17)

MSWD = 15.8,  $p(\chi^2) = 0$

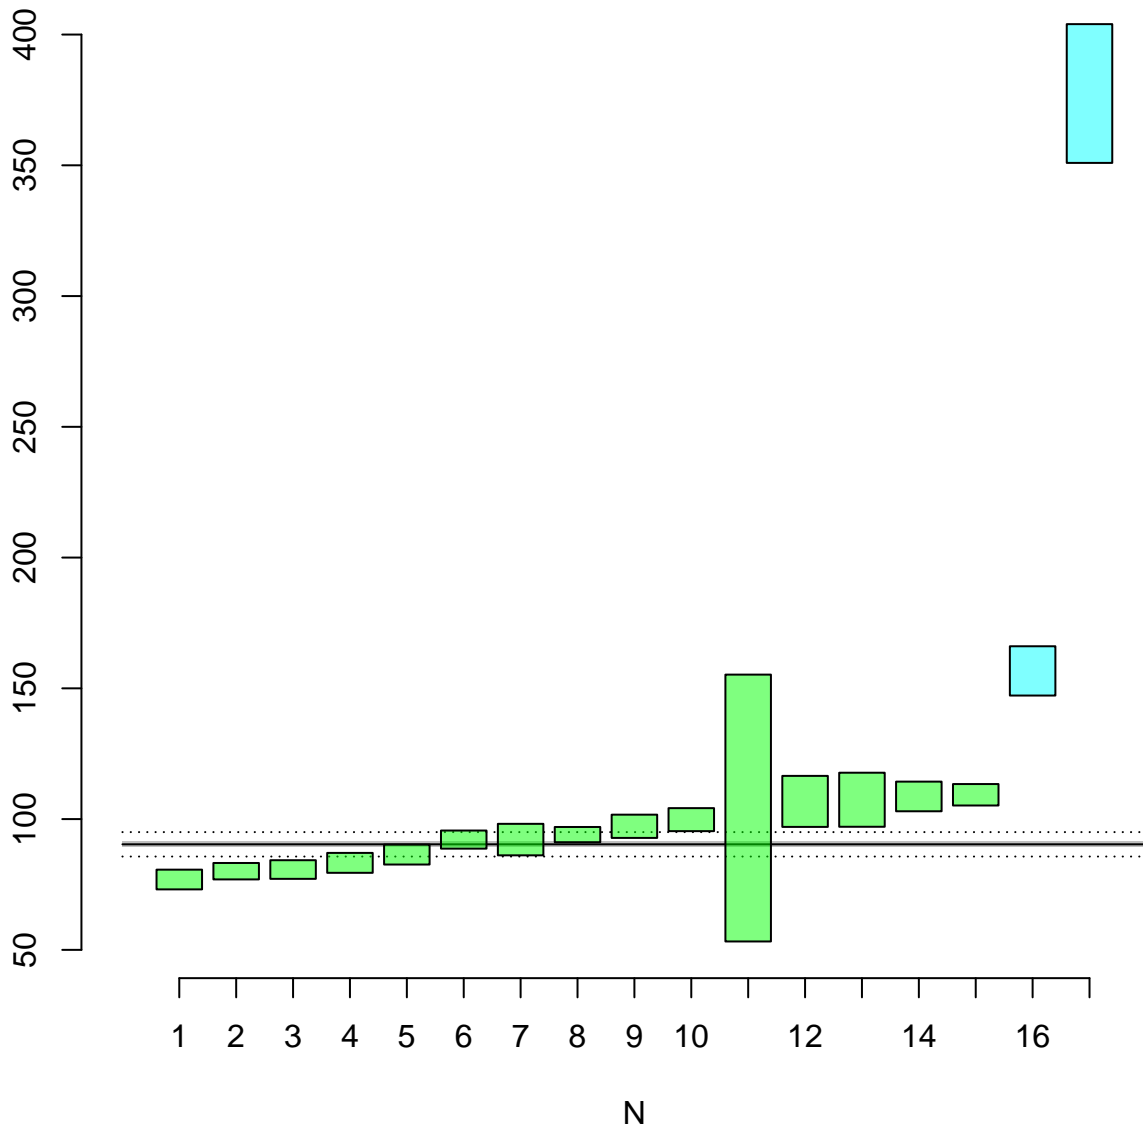

Sample 5

mean =  $93.72 \pm 0.98$  | 1.61 Ma (n=6/6)  
MSWD = 0.85,  $p(\chi^2) = 0.51$

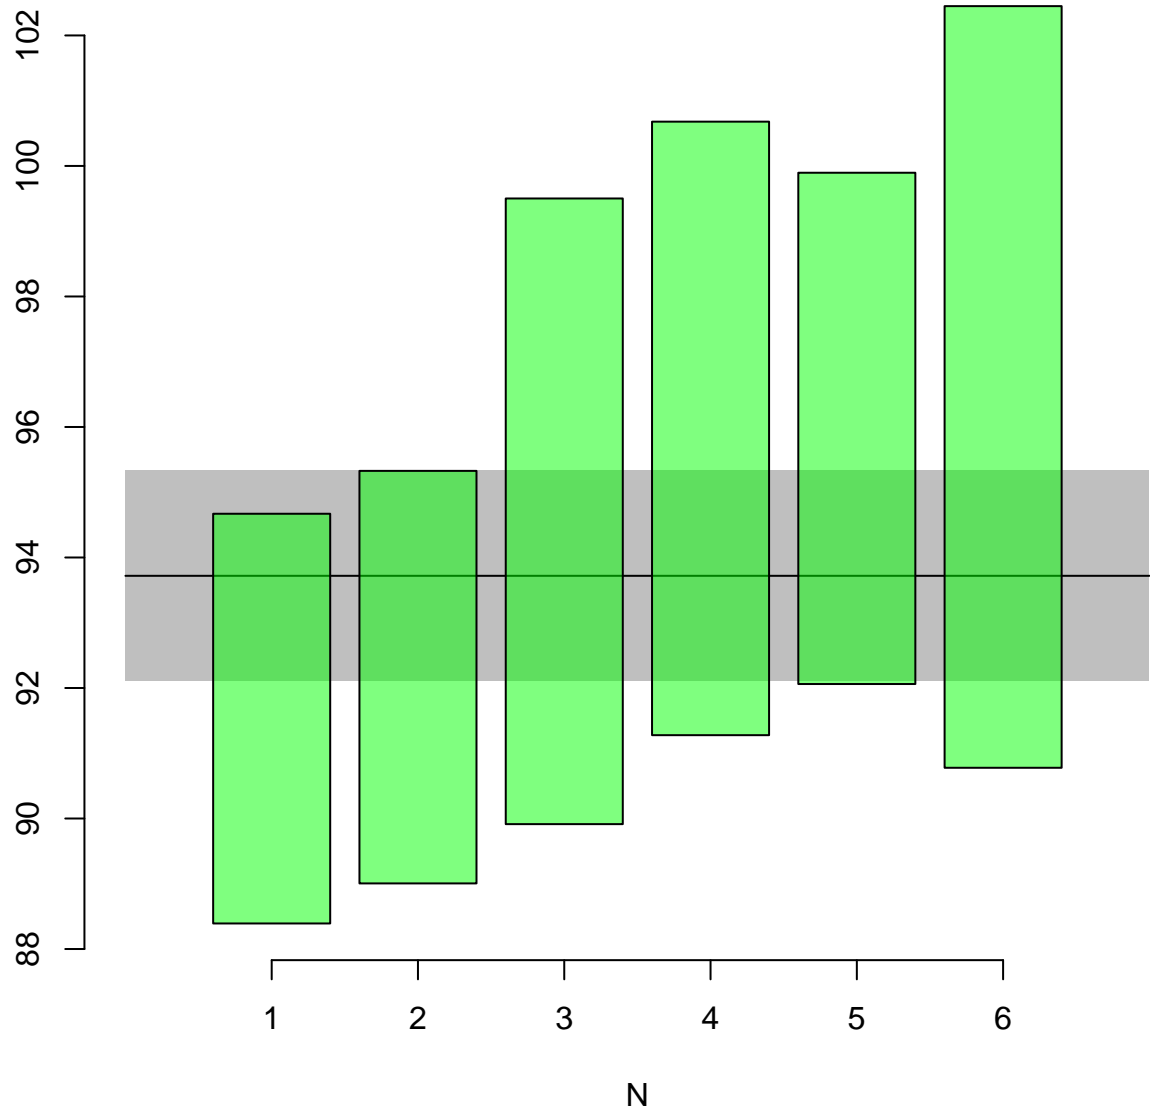

Sample 6

mean =  $94.02 \pm 0.73$  | 1.20 | 2.81 Ma (n=10/10)

MSWD = 4.45,  $p(\chi^2) = 0.0000075$

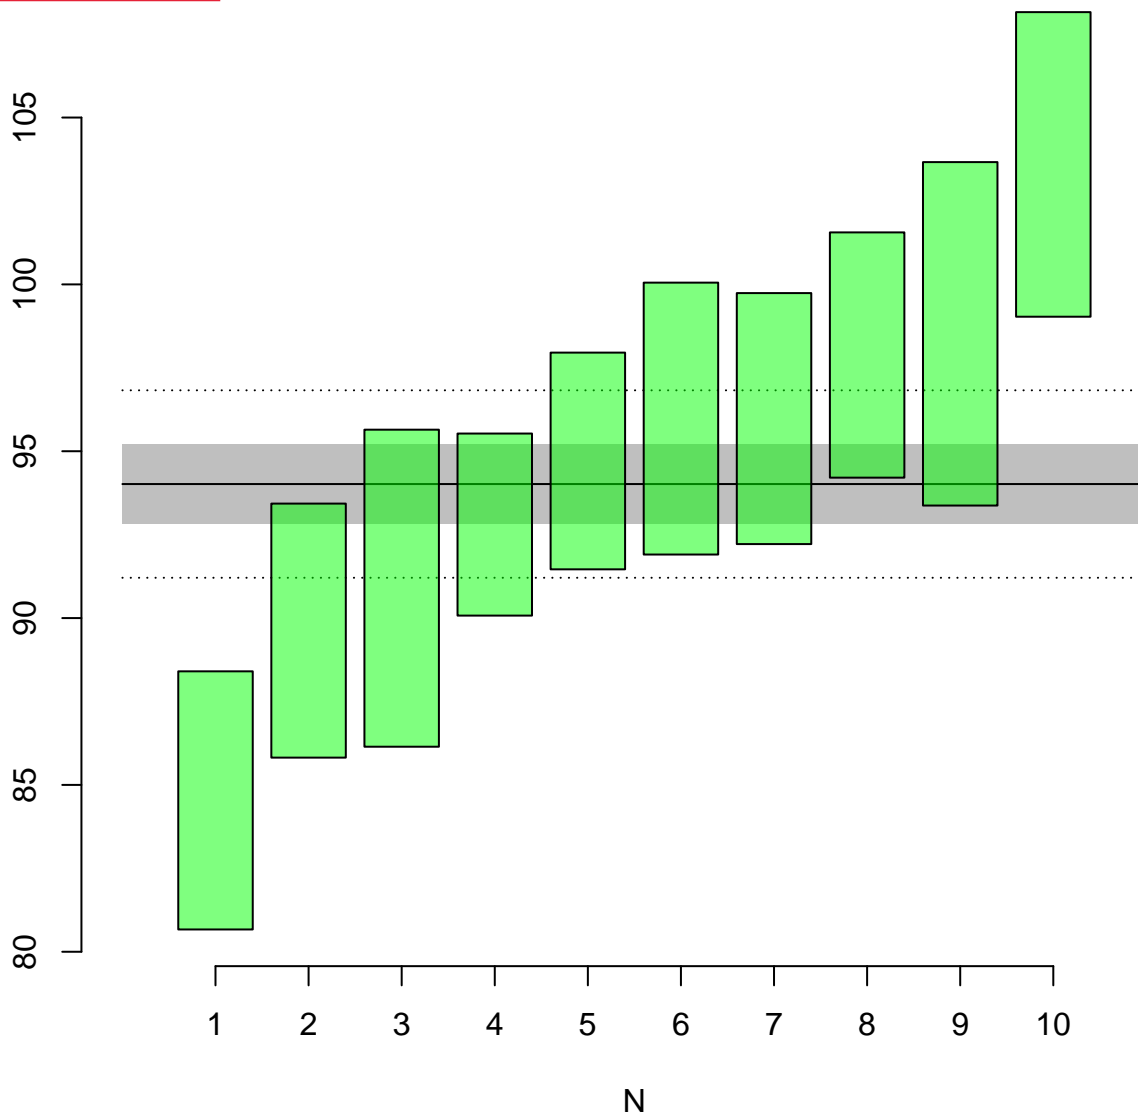

Sample 7

mean =  $92.72 \pm 0.87$  | 1.43 Ma (n=7/9)

MSWD = 0.36,  $p(\chi^2) = 0.90$

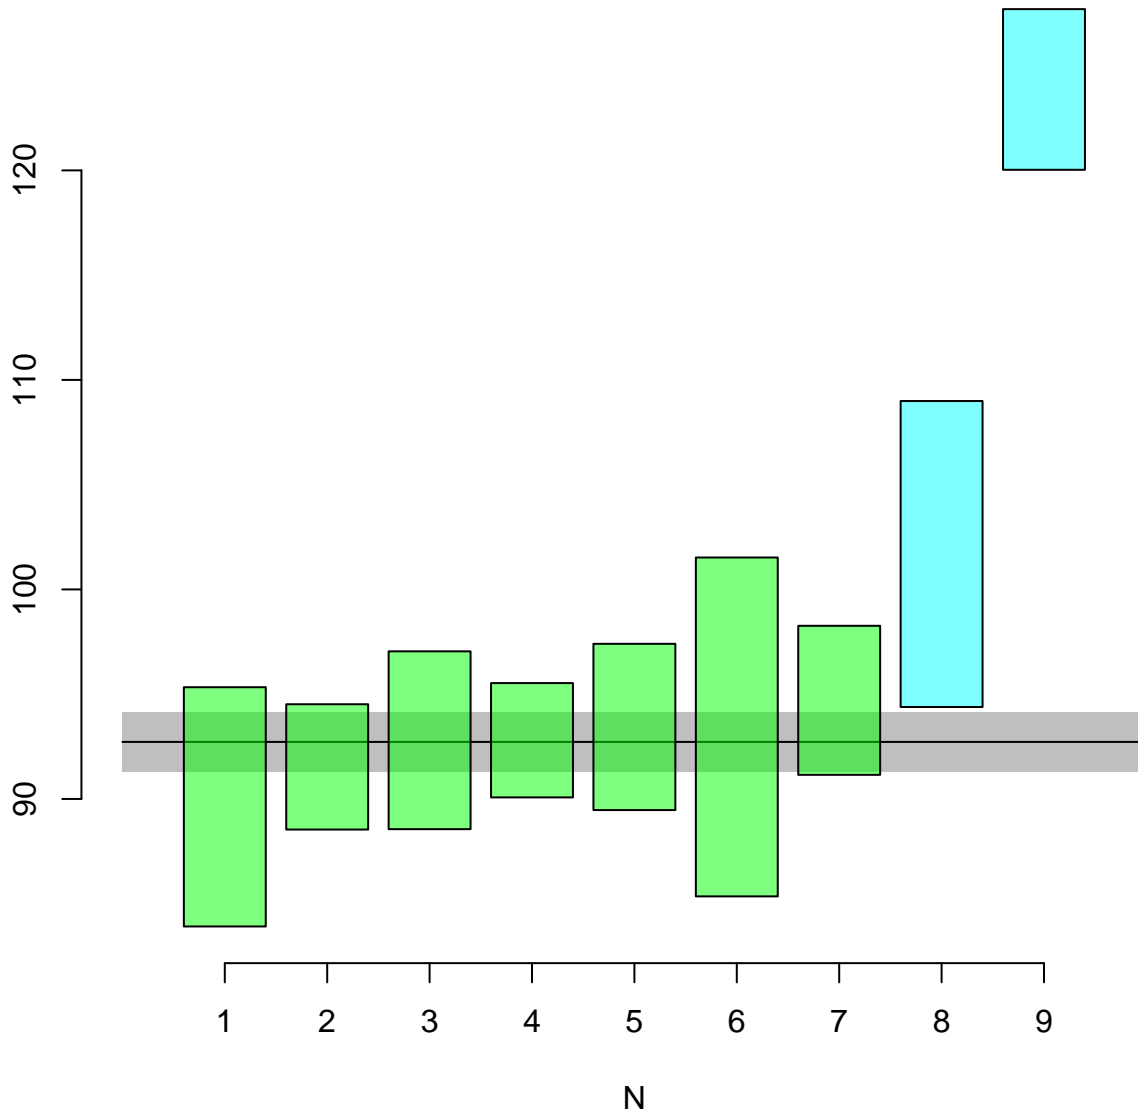

Sample 9

mean =  $92.14 \pm 0.61$  | 1.01 | 3.73 Ma (n=14/14)

MSWD = 11.8,  $p(\chi^2) = 0$

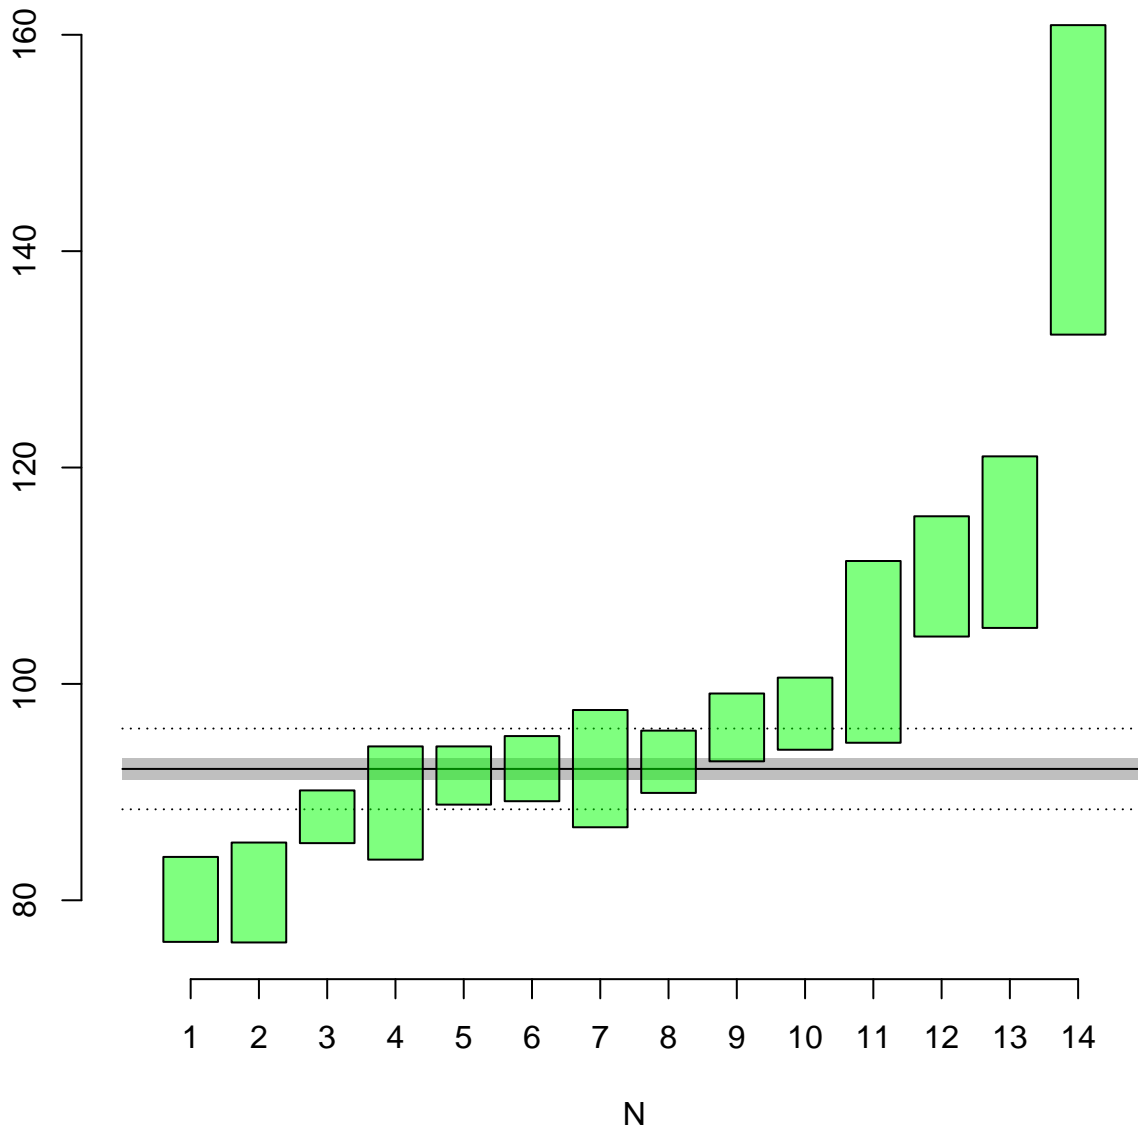



Sample 10

mean =  $93.85 \pm 1.52$  | 2.49 Ma (n=2/2)  
MSWD = 2.41,  $p(\chi^2) = 0.12$

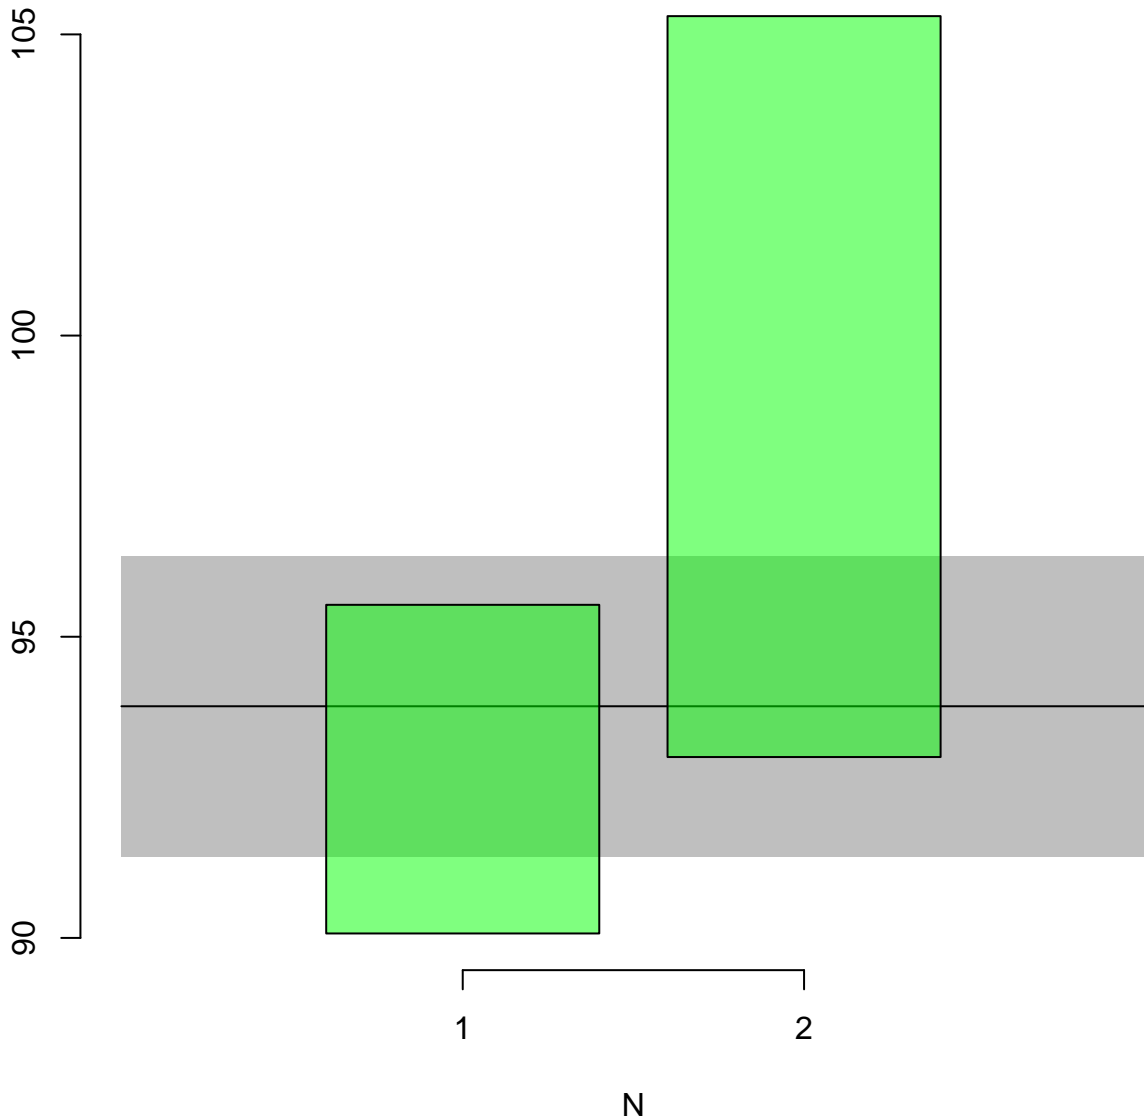

mean =  $93.71 \pm 0.81$  | 1.33 Ma (n=7/11)  
MSWD = 0.15,  $p(\chi^2) = 0.99$

Sample 12

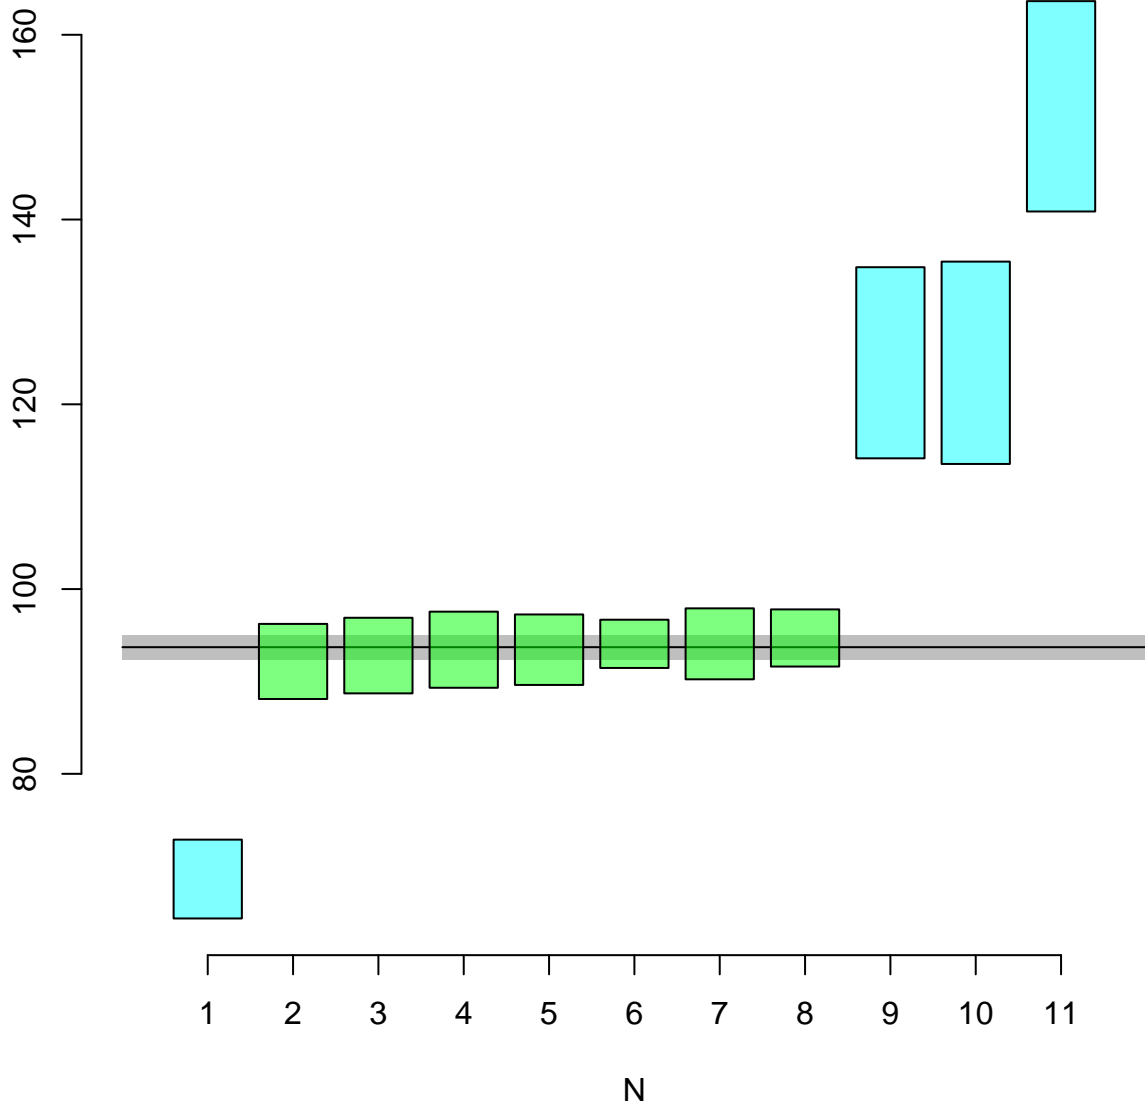

Sample 15

mean =  $95.58 \pm 0.91$  | 1.50 | 6.33 Ma (n=8/8)

MSWD = 13.5,  $p(\chi^2) = 0$

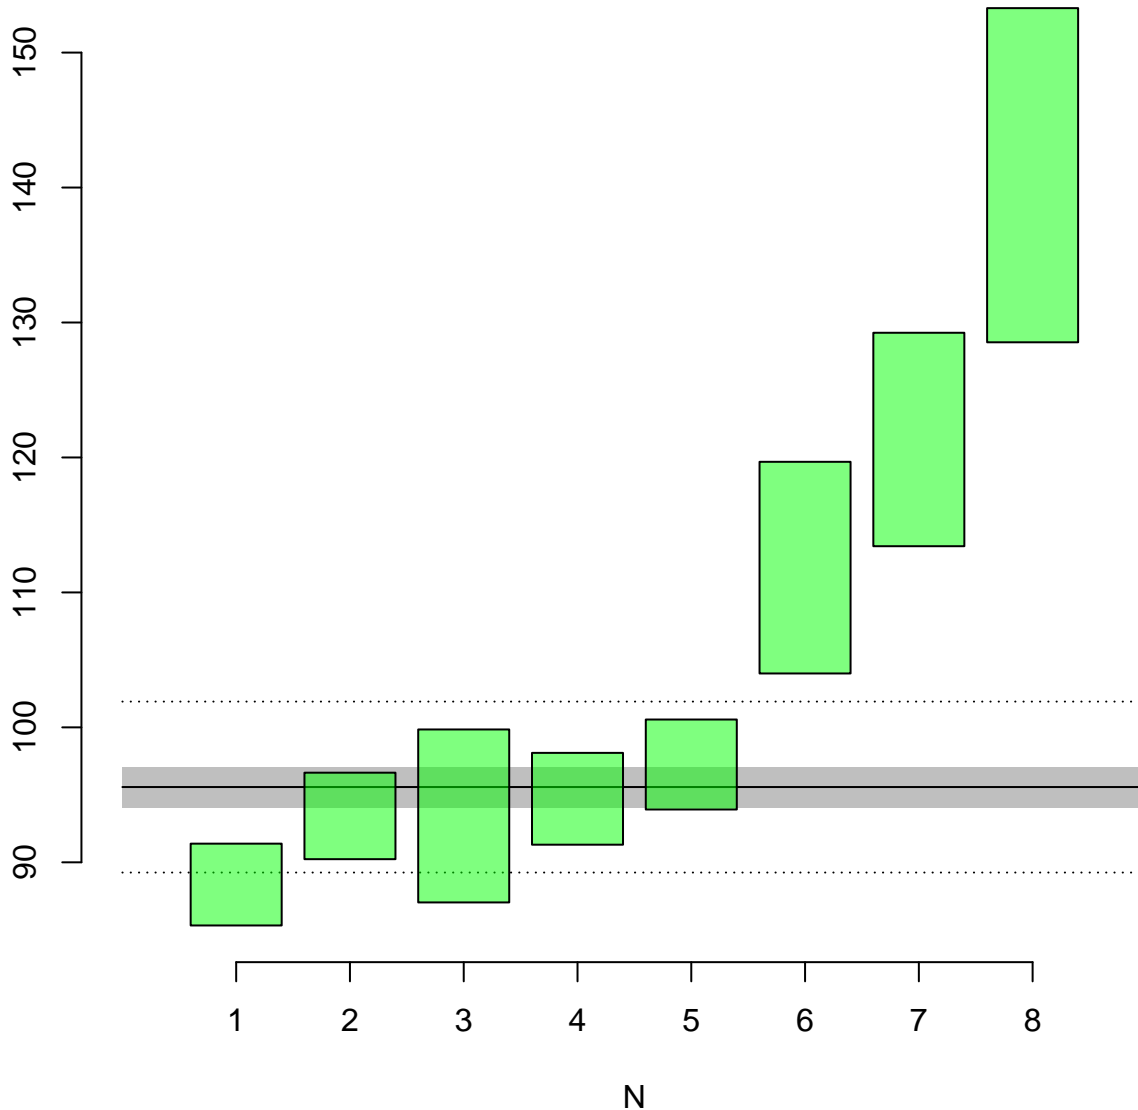

Sample 16

mean =  $96.60 \pm 1.48$  | 2.44 | 5.05 Ma (n=4/4)

MSWD = 2.10,  $p(\chi^2) = 0.098$

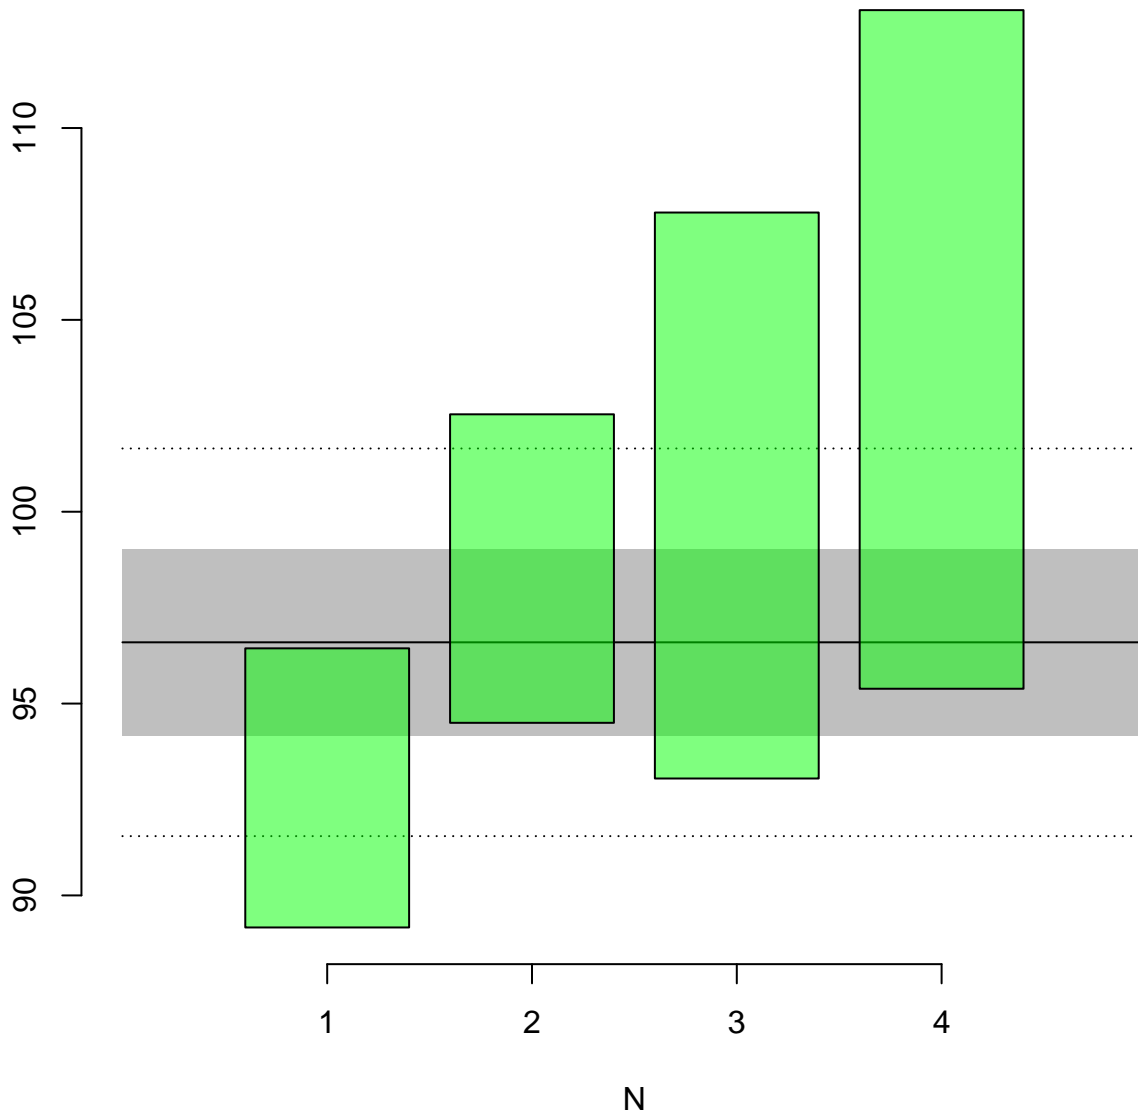

Sample 17

mean =  $100.00 \pm 1.95$  | 3.20 | 34.56 Ma (n=4/5)

MSWD = 56.9,  $p(\chi^2) = 0$

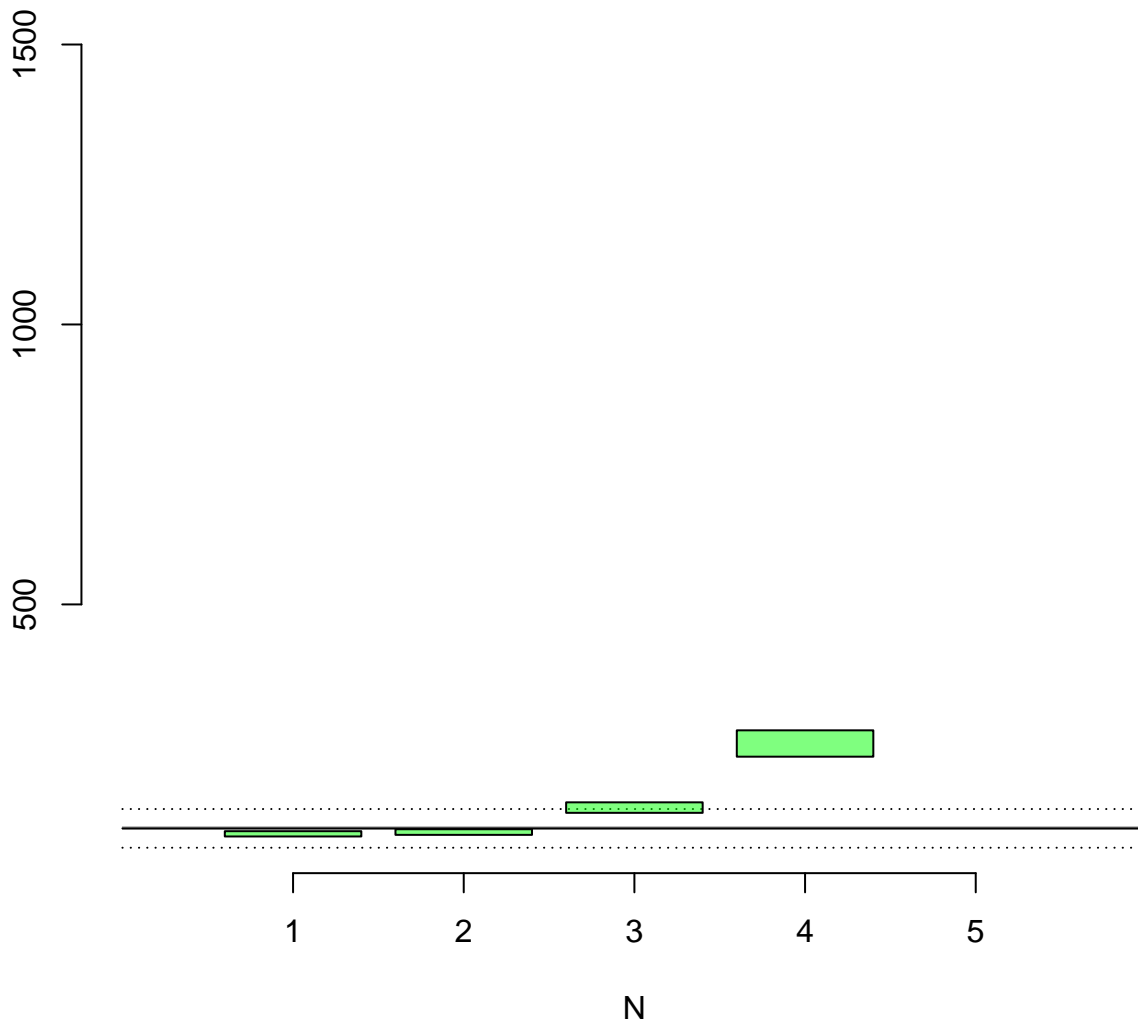

Sample 18

mean =  $95.44 \pm 0.80$  | 1.32 | 3.25 Ma (n=8/8)

MSWD = 4.60,  $p(\chi^2) = 0.000038$

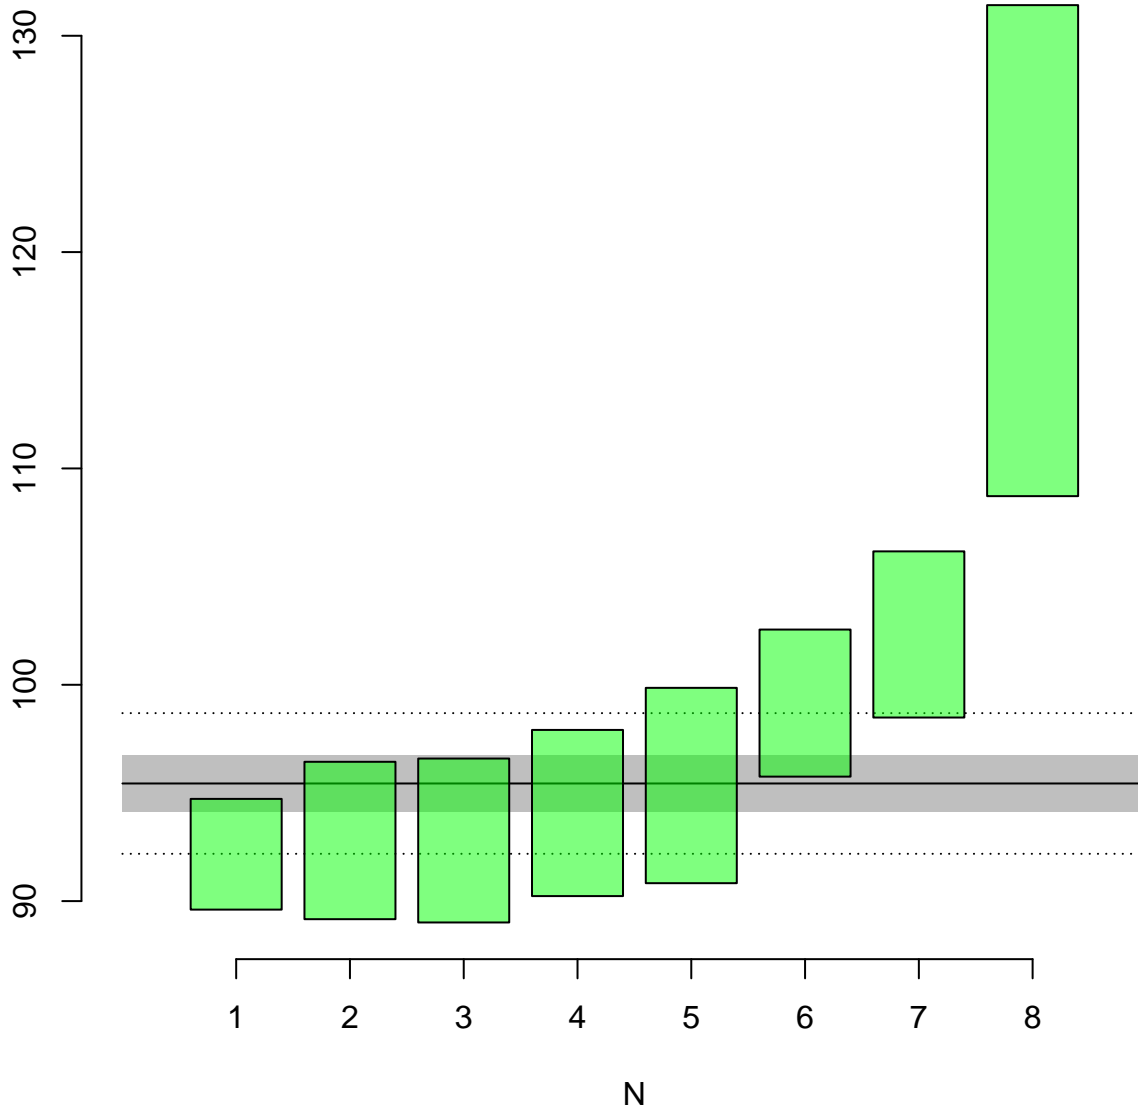

Sample 19

mean =  $95.68 \pm 0.98$  | 1.62 | 5.29 Ma (n=6/8)

MSWD = 7.11,  $p(\chi^2) = 0.0000012$

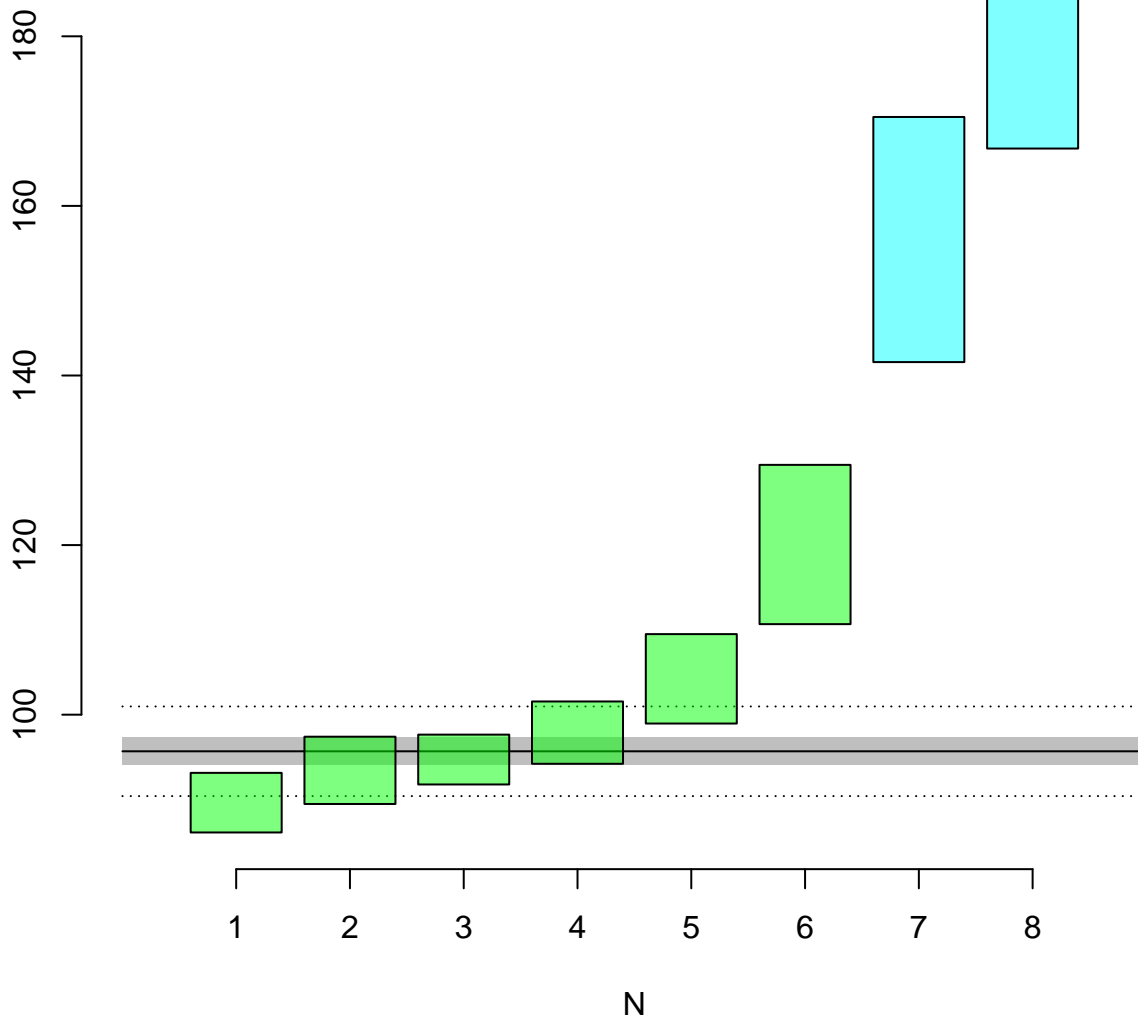

Sample 20

mean =  $96.62 \pm 1.14$  | 1.87 Ma (n=3/3)

MSWD = 2.05,  $p(\chi^2) = 0.13$

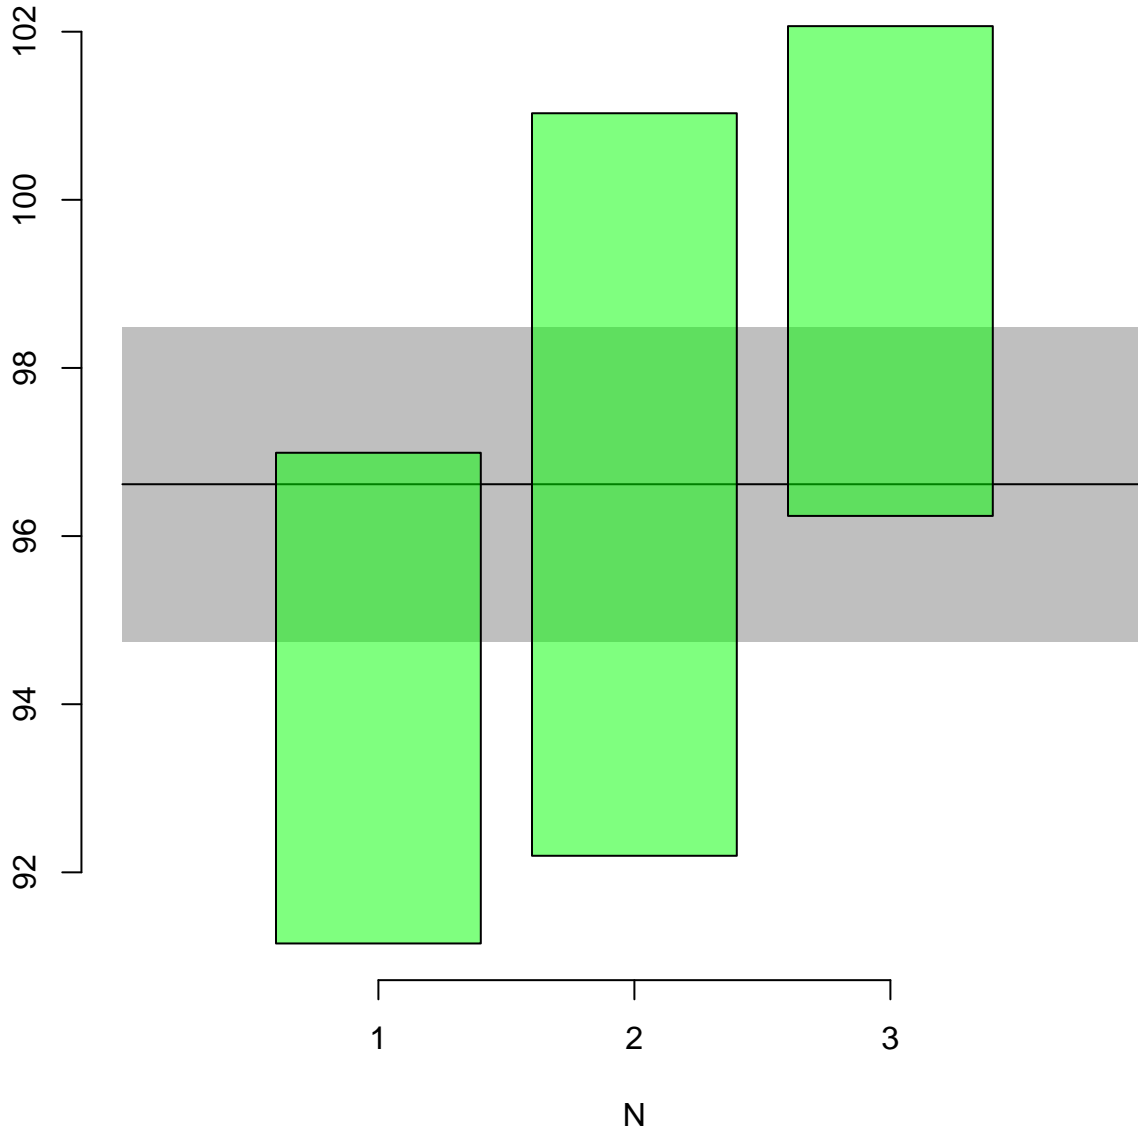



Sample 21

mean =  $92.92 \pm 0.35$  | 0.58 | 1.15 Ma (n=39/46)

MSWD = 3.73,  $p(\chi^2) = 0.0000000000000066$

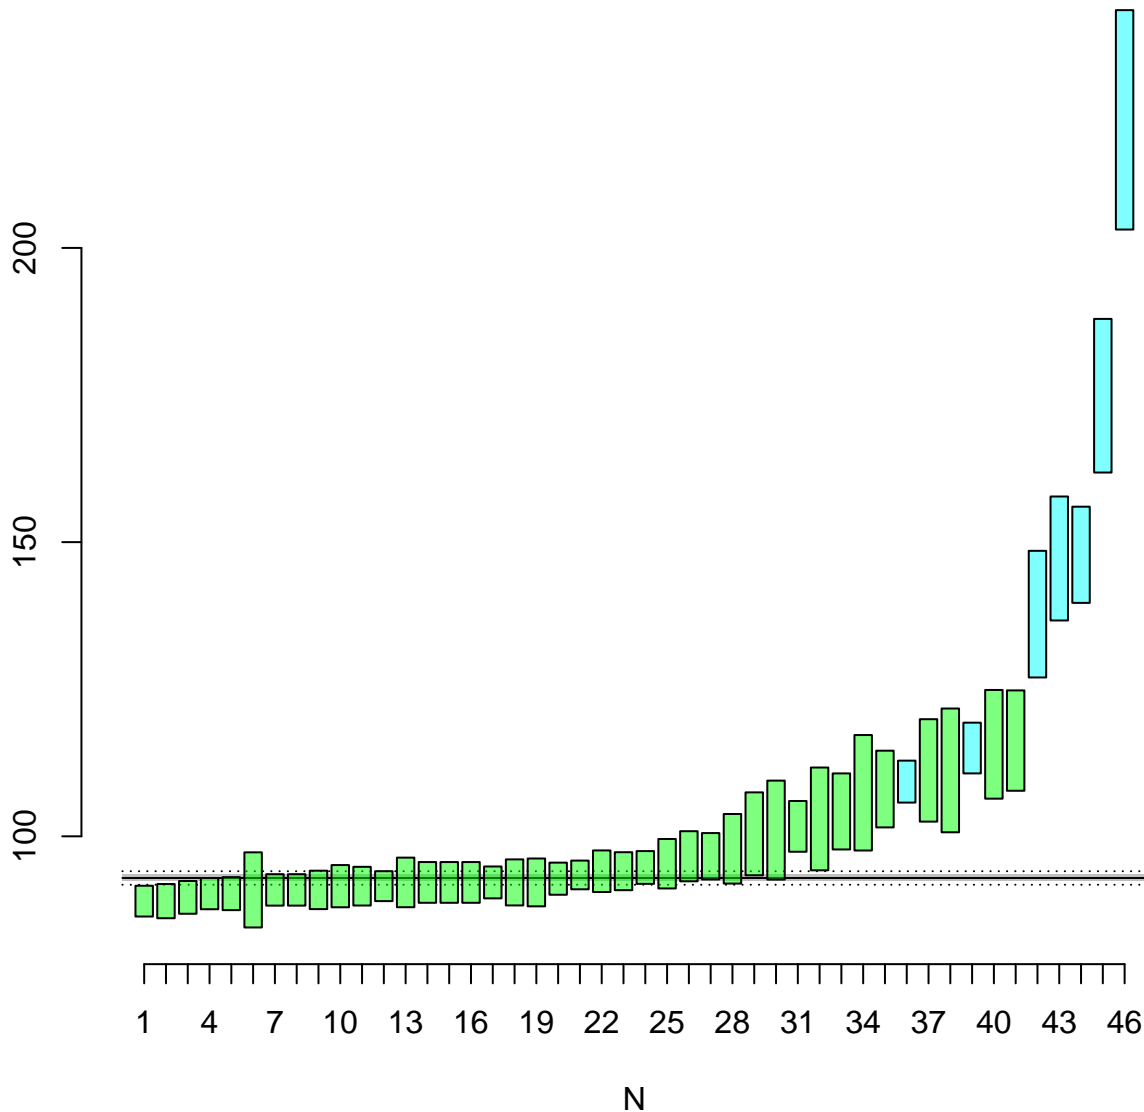

Sample 22

mean =  $97.43 \pm 0.76$  | 1.25 | 4.87 Ma (n=11/11)

MSWD = 12.4,  $p(\chi^2) = 0$

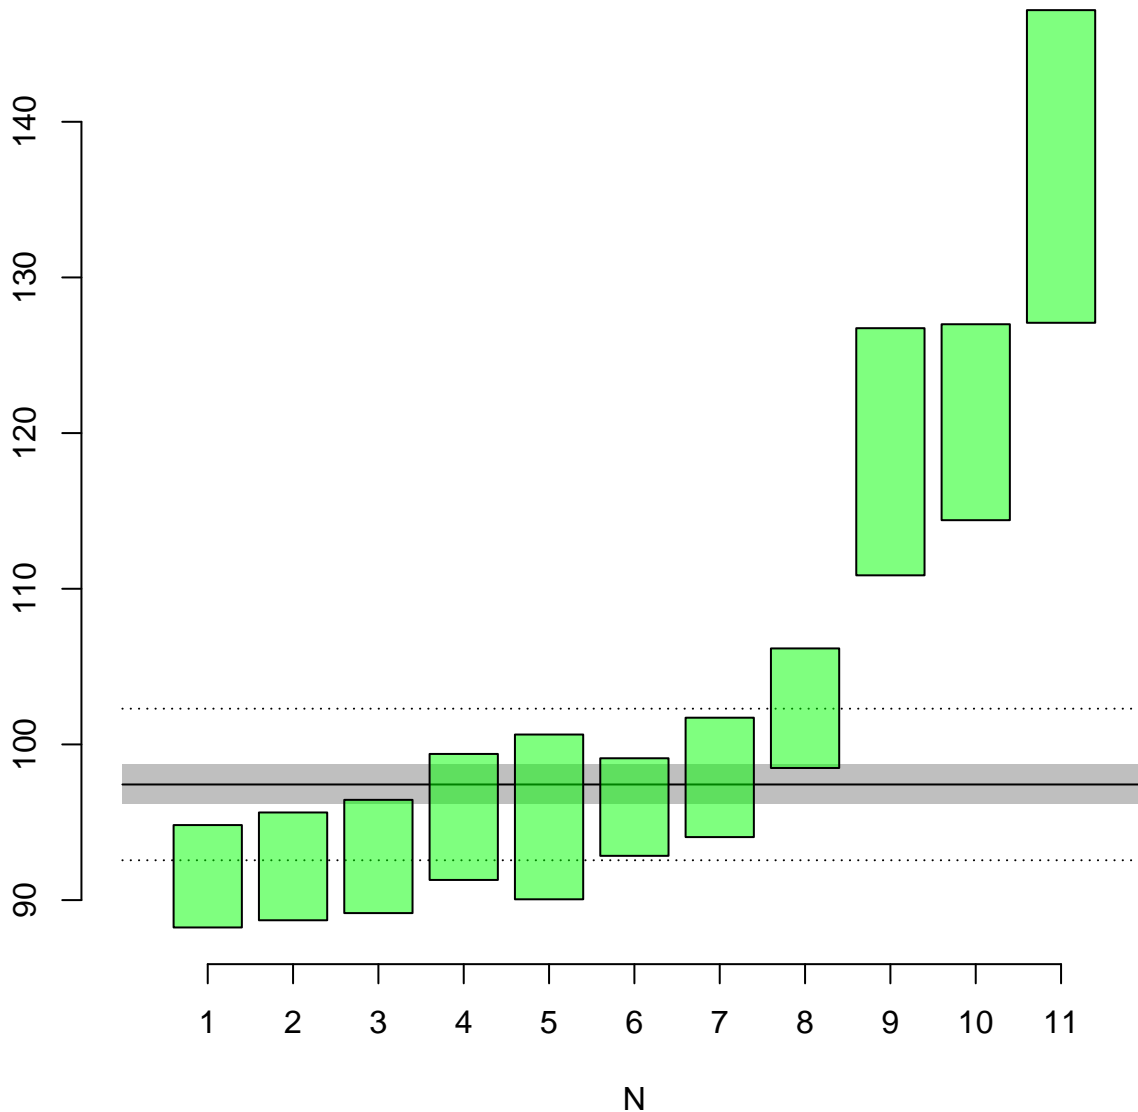

Sample 23

mean =  $124.66 \pm 3.31$  | 5.45 | 43.22 Ma (n=2/2)  
MSWD = 4.27,  $p(\chi^2) = 0.039$

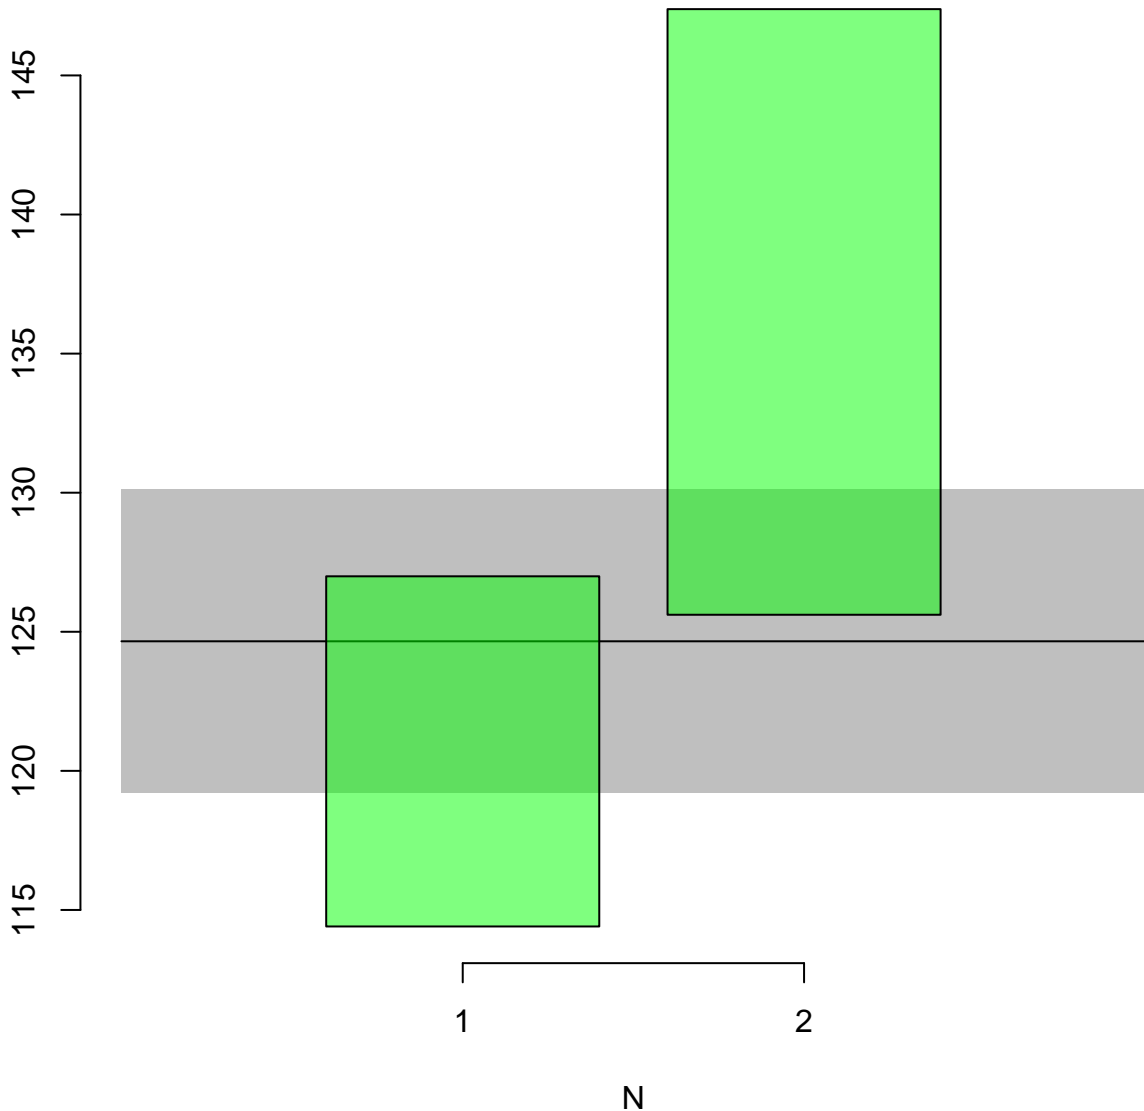

Sample 25

mean =  $91.30 \pm 0.84$  | 1.38 | 3.63 Ma (n=5/6)

MSWD = 4.12,  $p(\chi^2) = 0.0025$

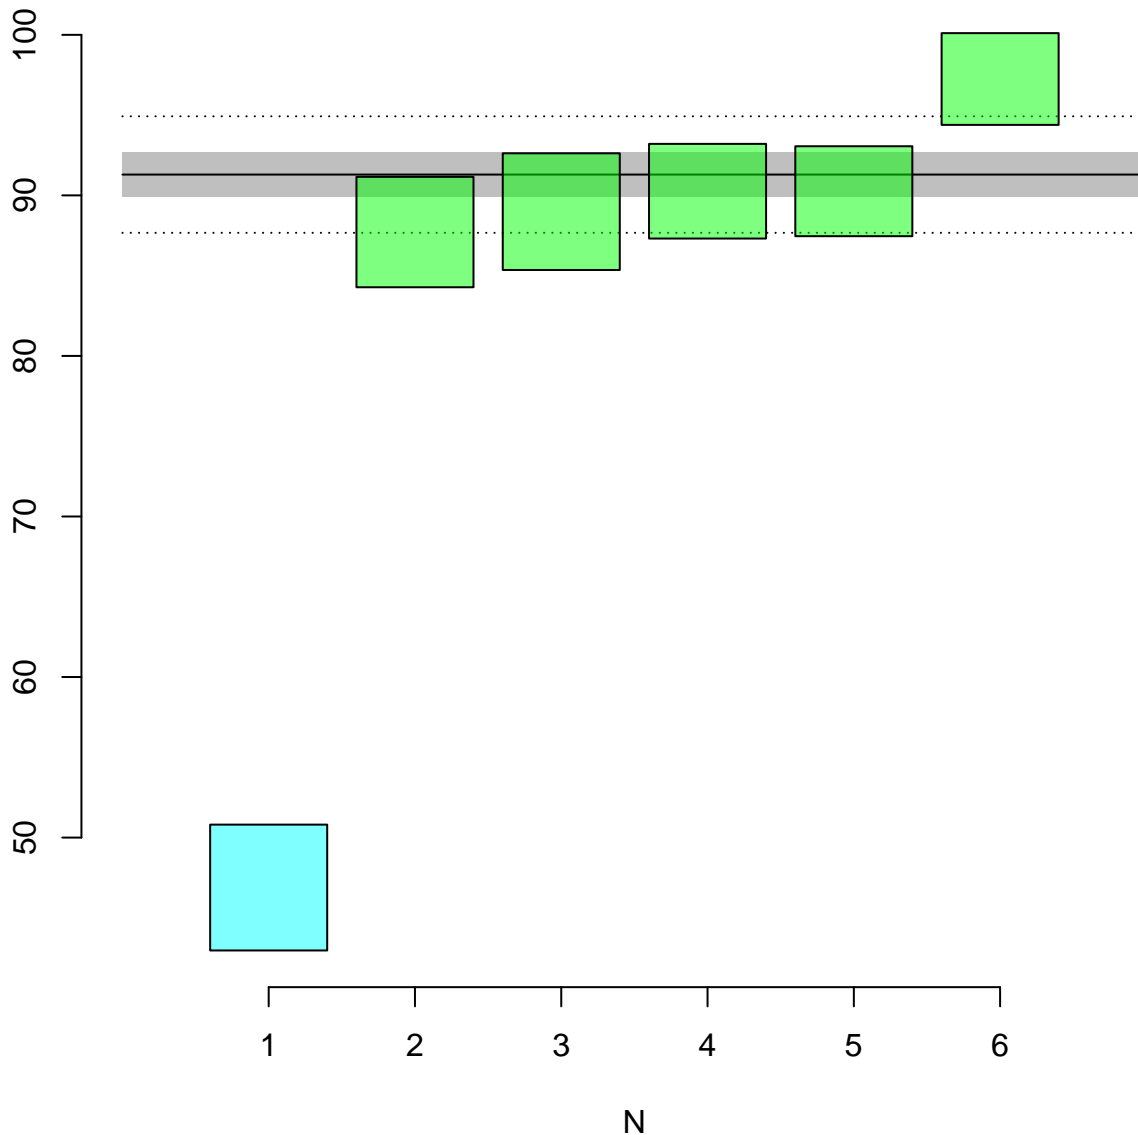

Sample 26

mean =  $94.45 \pm 0.53$  | 0.88 | 1.60 Ma (n=15/17)

MSWD = 2.88,  $p(\chi^2) = 0.00023$

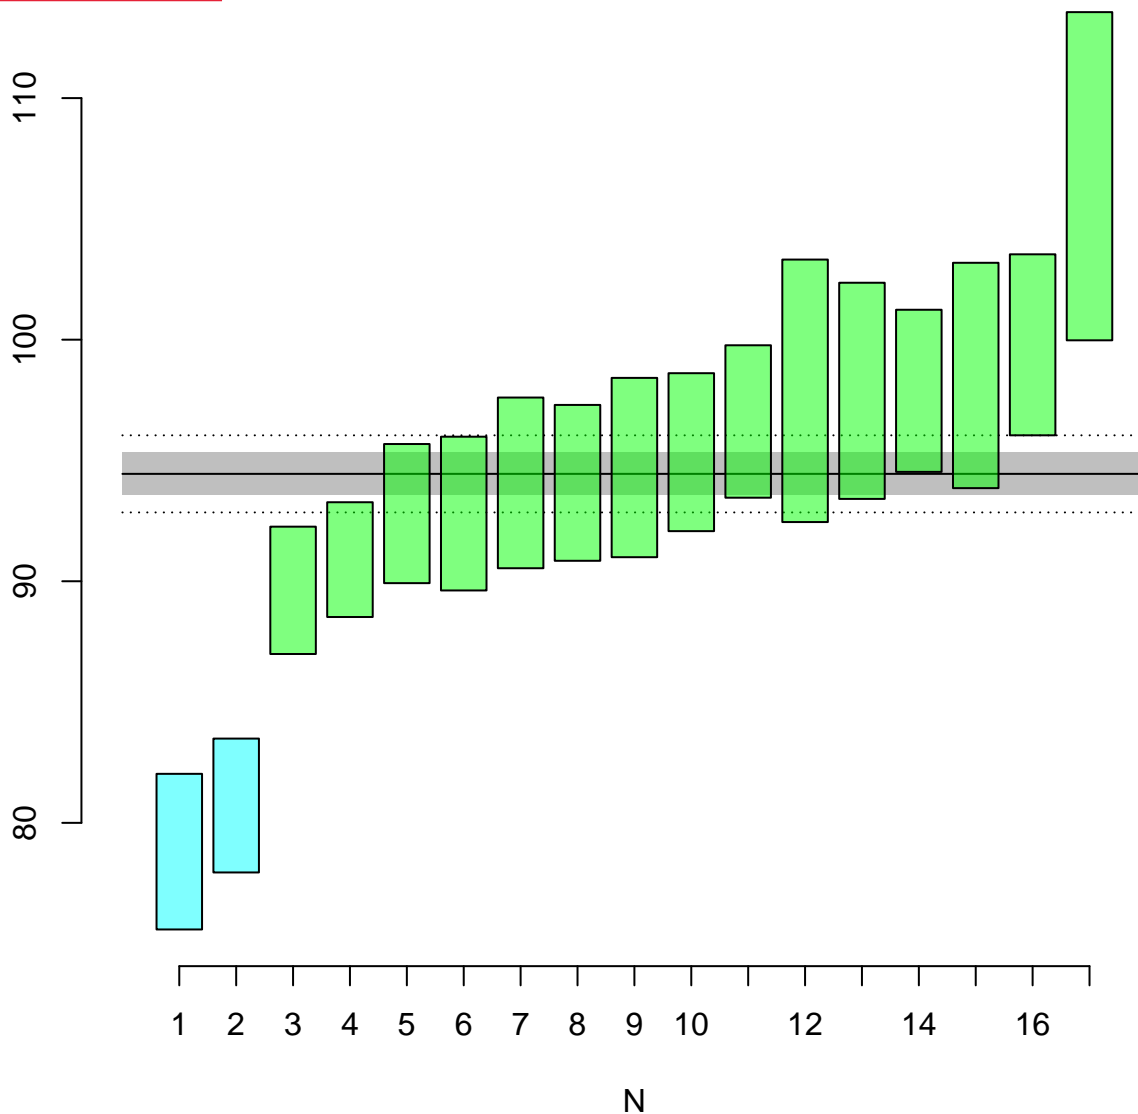

Sample 27

mean =  $92.91 \pm 0.55$  | 0.90 | 1.44 Ma (n=17/17)

MSWD = 2.28,  $p(\chi^2) = 0.0025$

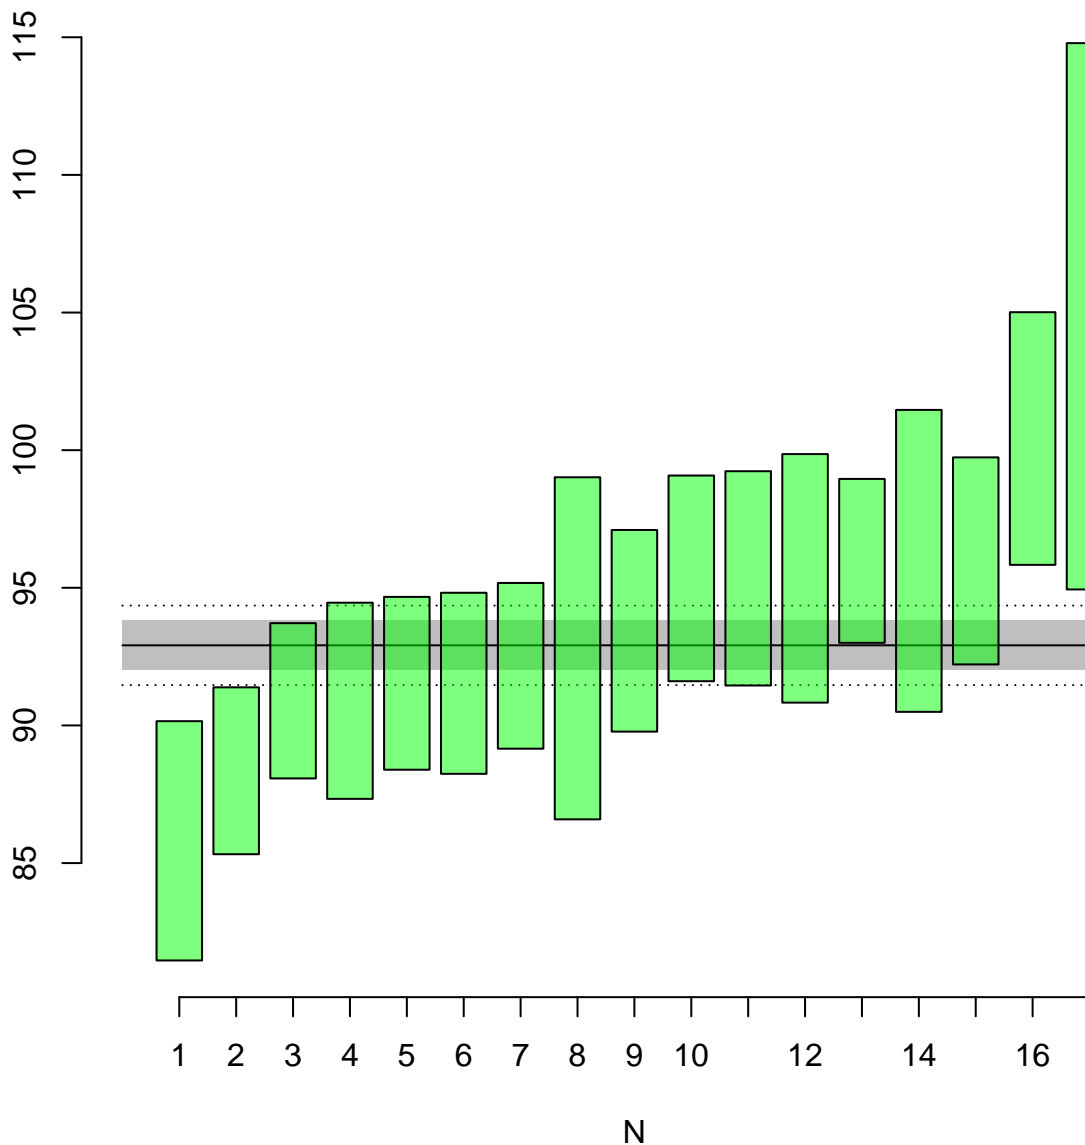

Sample 28

mean =  $92.60 \pm 0.84$  | 1.38 | 3.04 Ma (n=7/9)

MSWD = 3.46,  $p(\chi^2) = 0.0020$

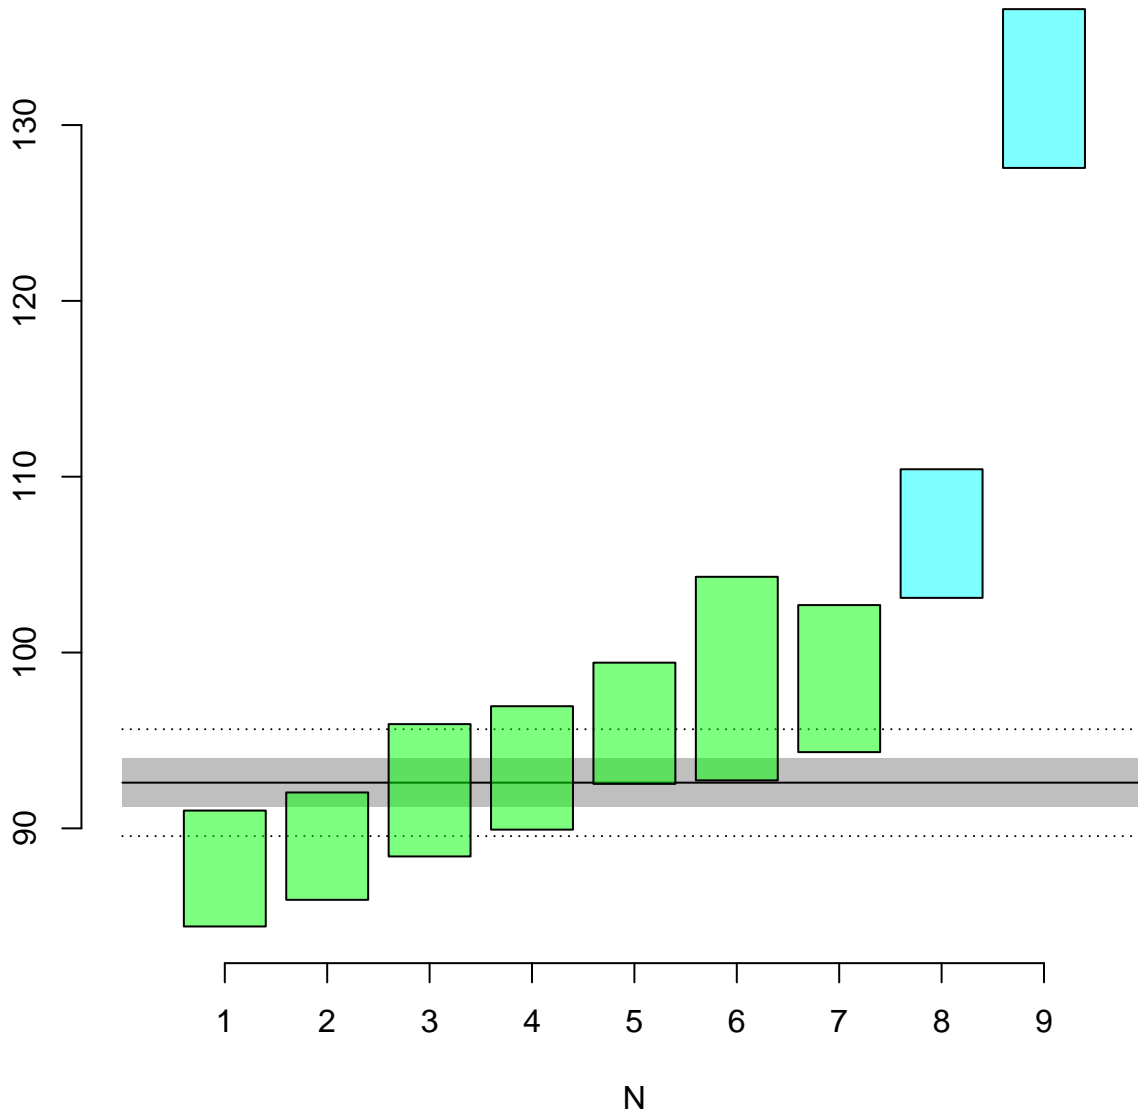

Sample 29

mean =  $93.42 \pm 0.41$  | 0.67 | 1.29 Ma (n=37/40)

MSWD = 3.50,  $p(\chi^2) = 0.00000000000067$

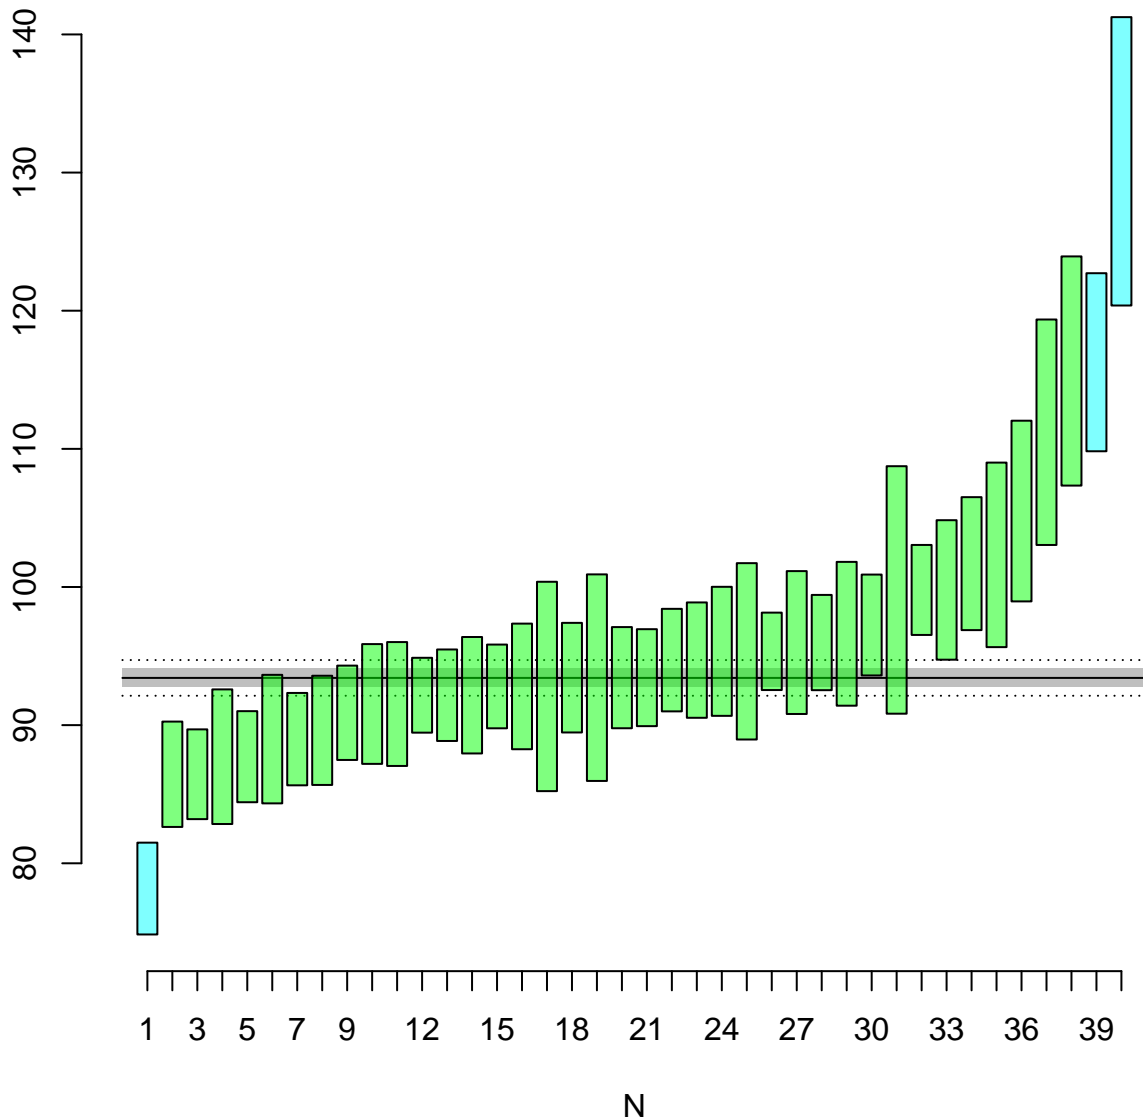



Sample 31

mean =  $93.11 \pm 1.23$  | 2.03 Ma (n=4/4)

MSWD = 1.94,  $p(\chi^2) = 0.12$

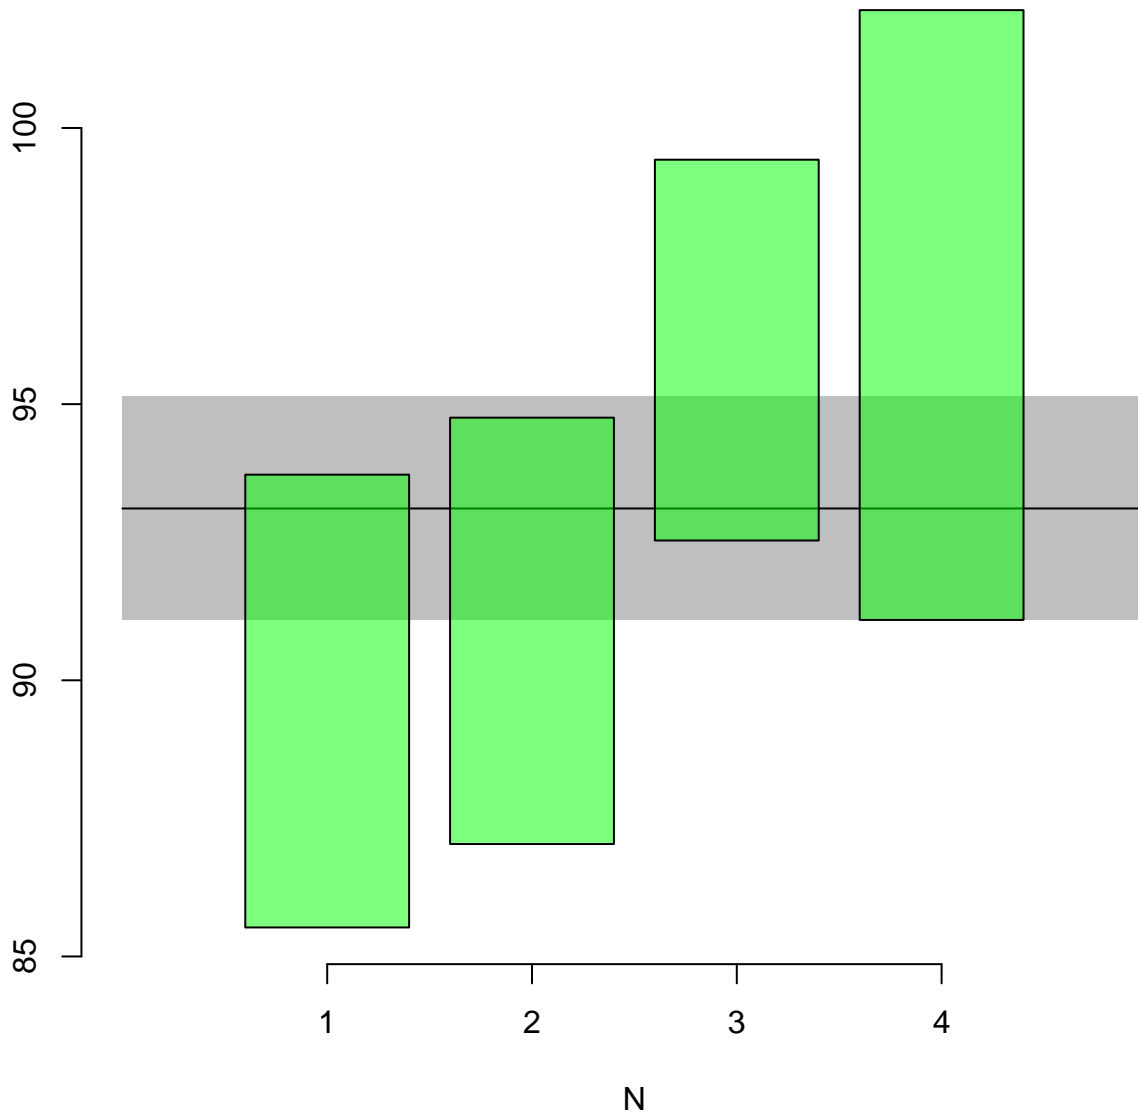

Sample 32

mean =  $95.35 \pm 0.44$  | 0.72 | 1.69 Ma (n=25/25)

MSWD = 5.18,  $p(\chi^2) = 0.00000000000000017$

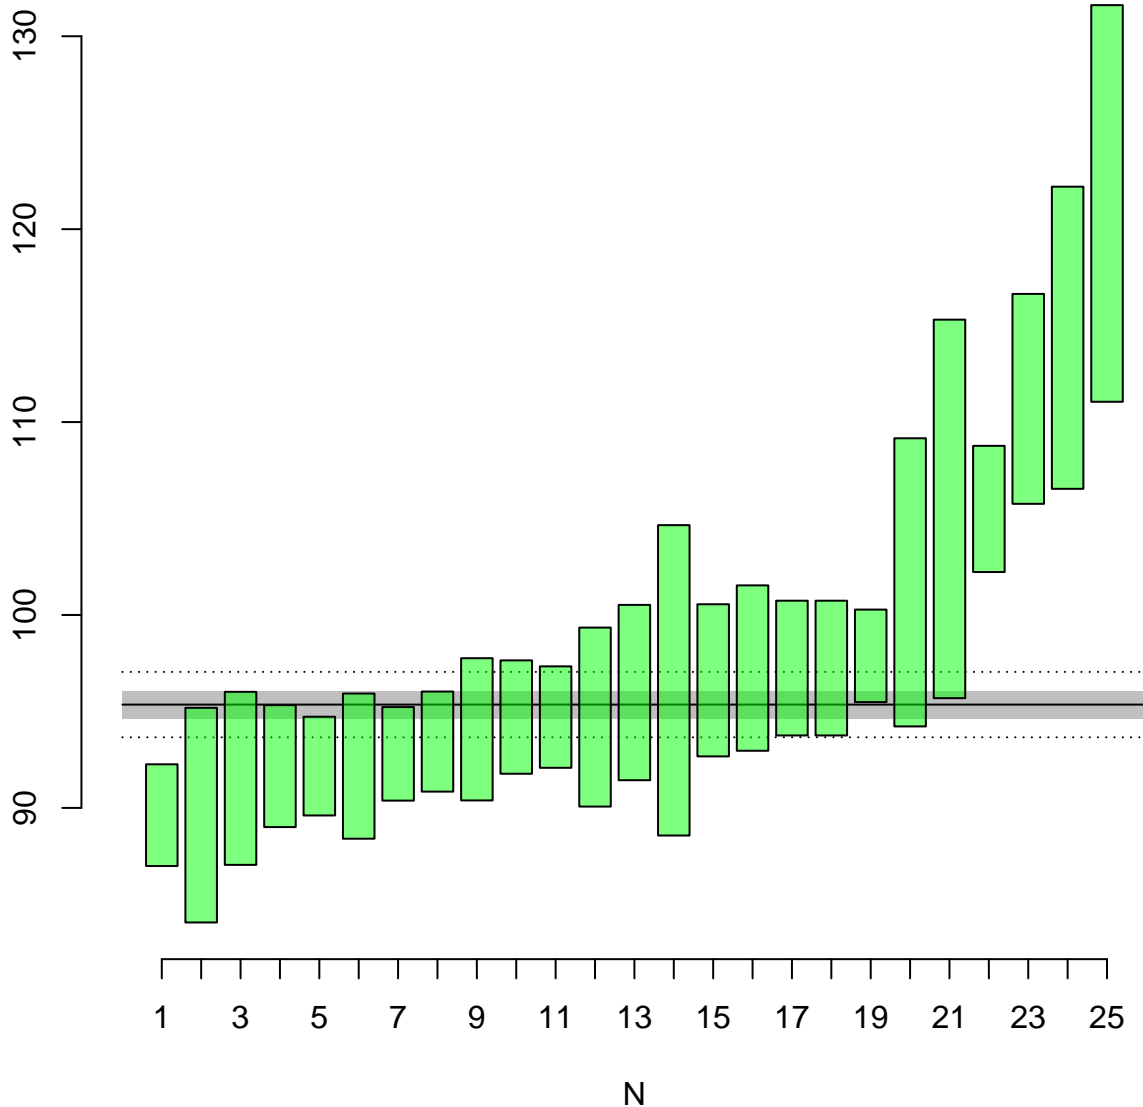

Sample 37

mean =  $91.80 \pm 0.99$  | 1.63 | 5.61 Ma (n=6/6)

MSWD = 7.90,  $p(\chi^2) = 0.00000019$

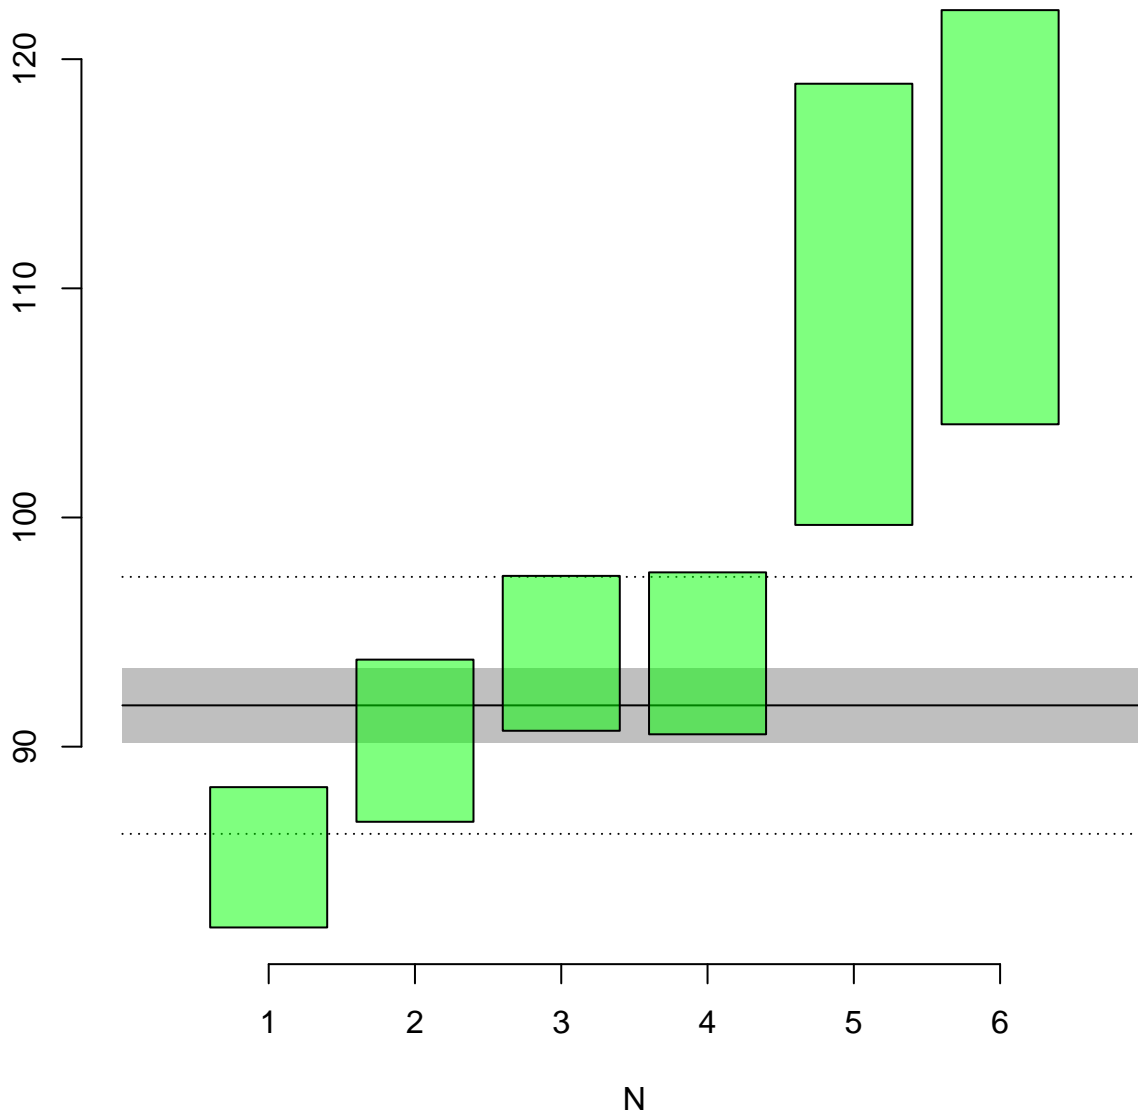

Sample 38

mean =  $88.75 \pm 0.64$  | 1.05 | 3.90 Ma (n=12/12)

MSWD = 11.6,  $p(\chi^2) = 0$

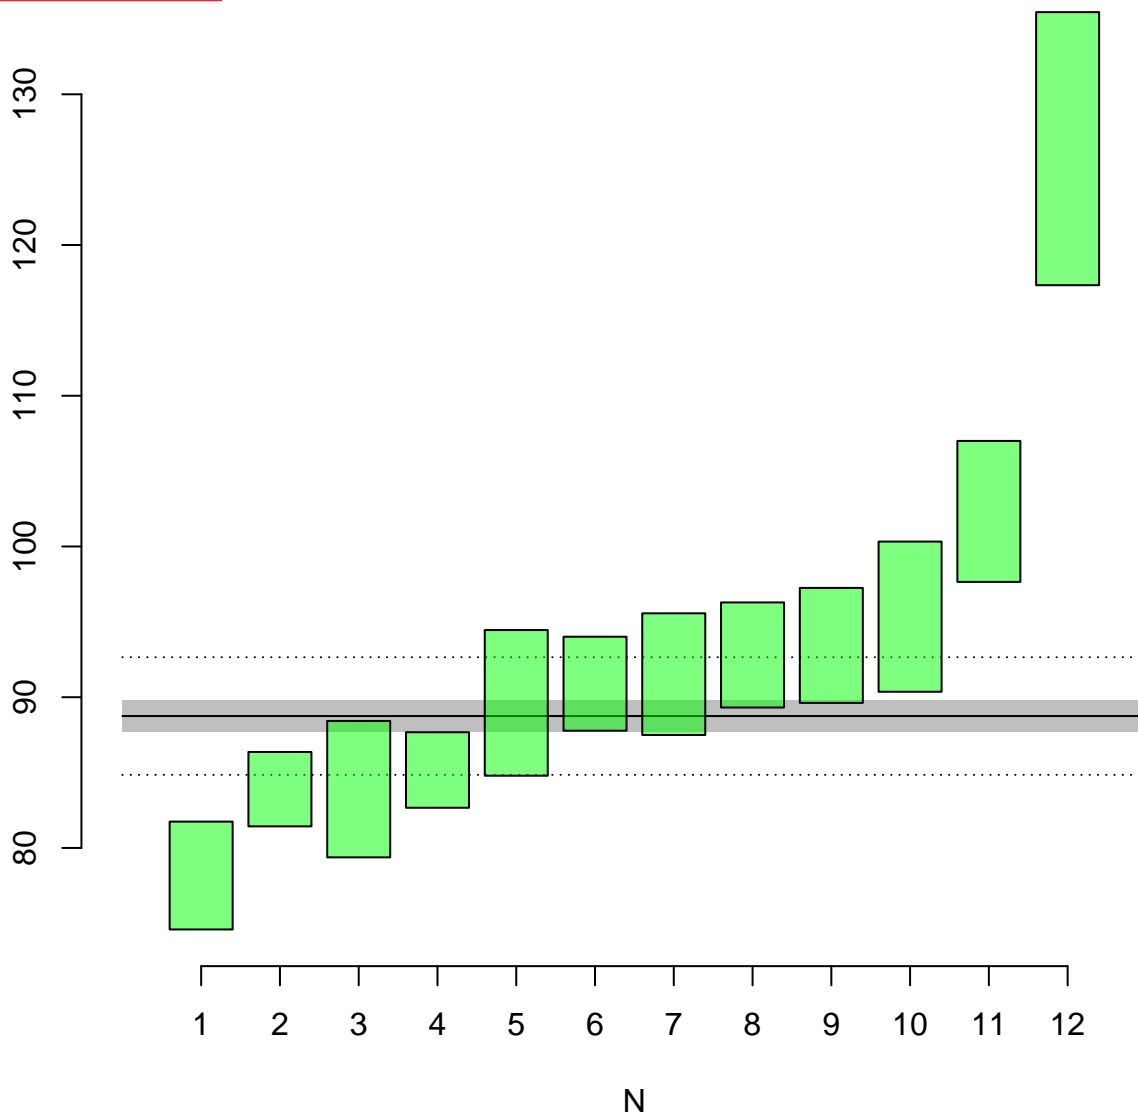

Sample 40

mean =  $93.26 \pm 0.64$  | 1.06 | 2.50 Ma (n=13/15)

MSWD = 4.74,  $p(\chi^2) = 0.000000083$

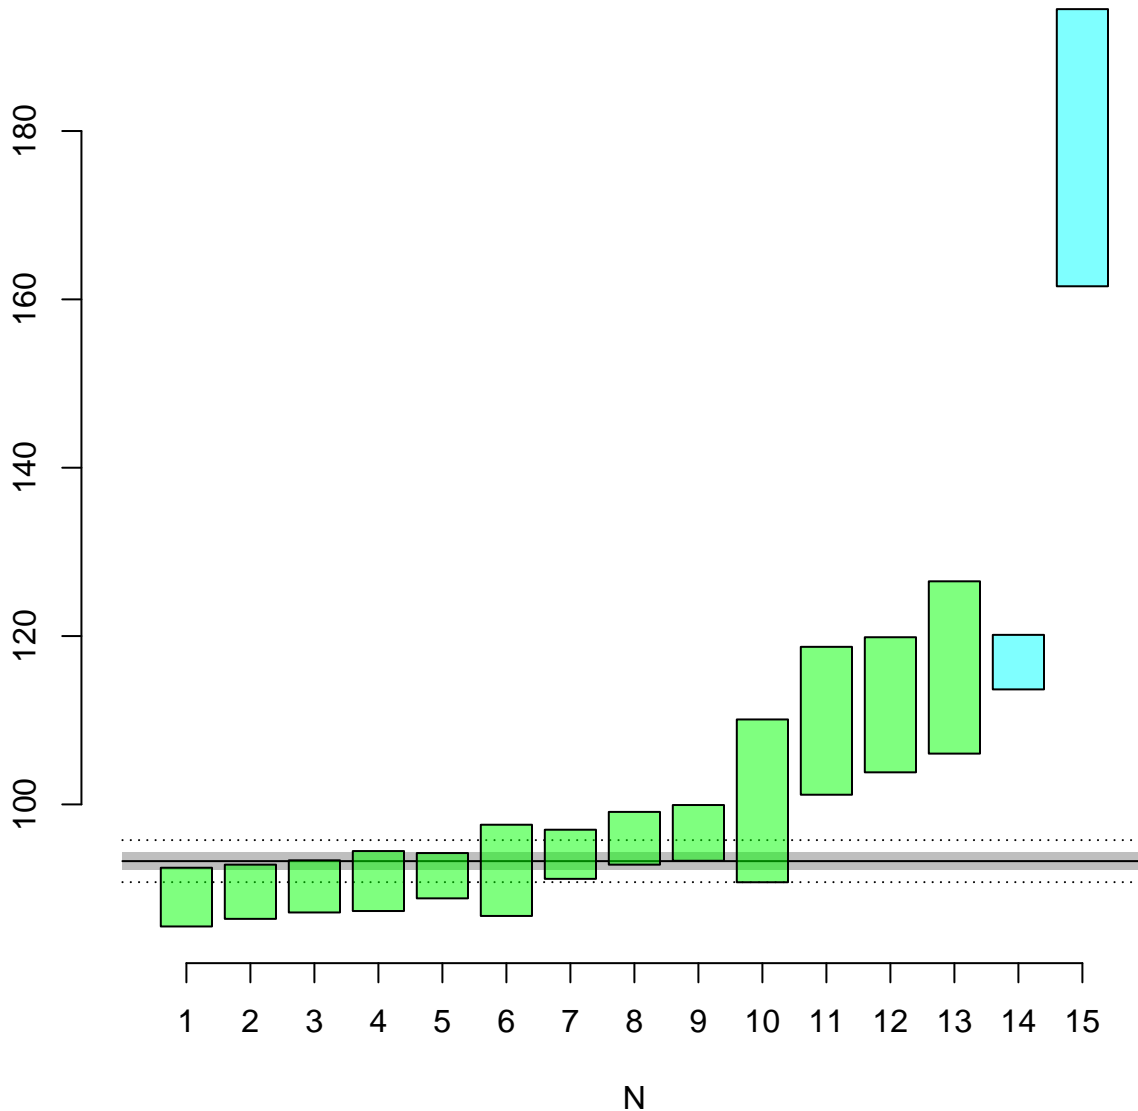

Sample 102

mean =  $95.46 \pm 0.57$  | 0.94 | 1.34 Ma (n=21/22)

MSWD = 1.82,  $p(\chi^2) = 0.013$

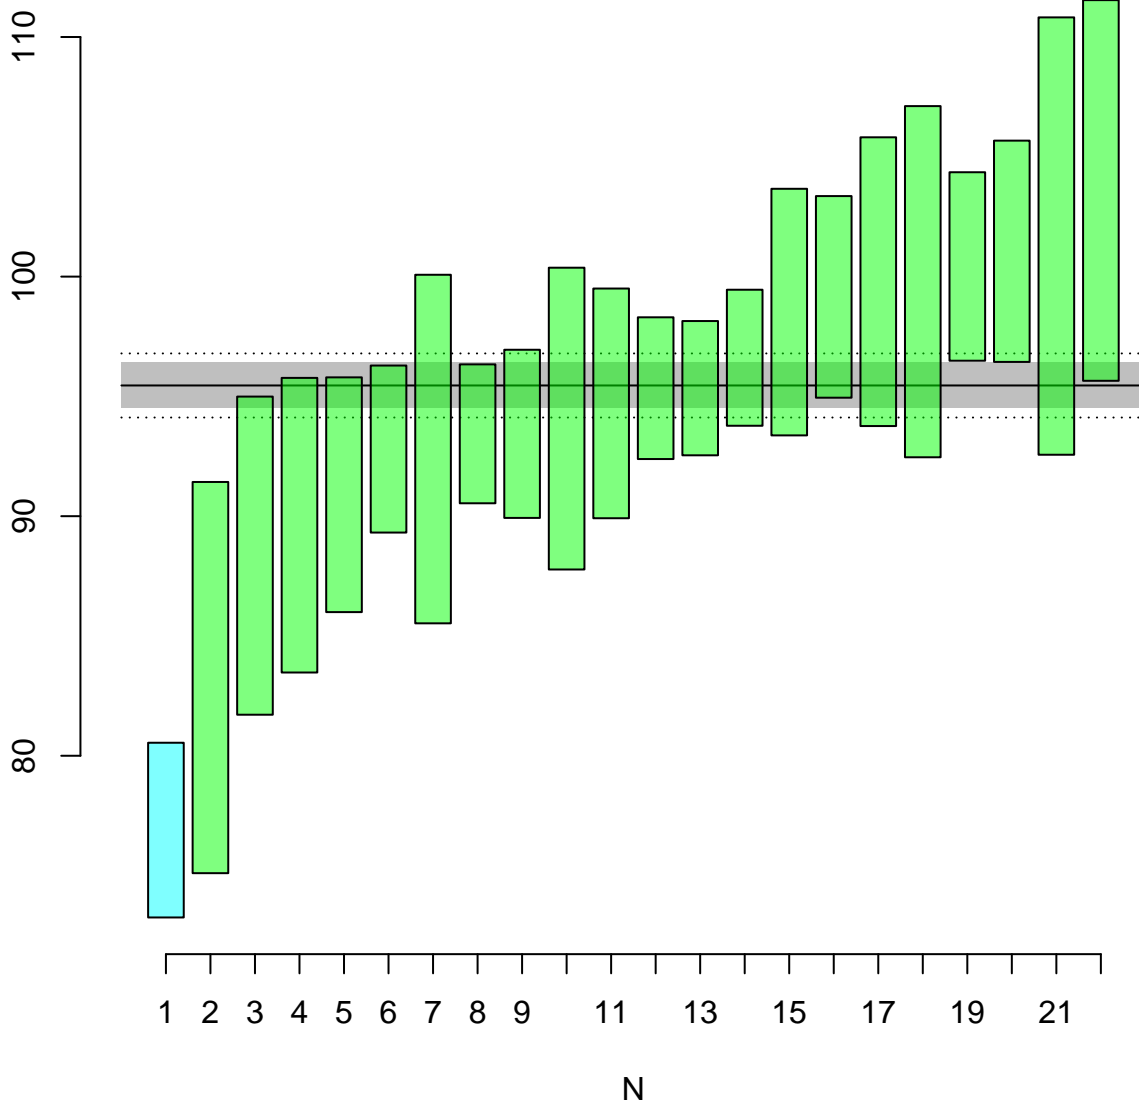

Sample 126

mean =  $74.91 \pm 0.50$  | 0.82 | 3.10 Ma (n=26/29)

MSWD = 13.2,  $p(\chi^2) = 0$

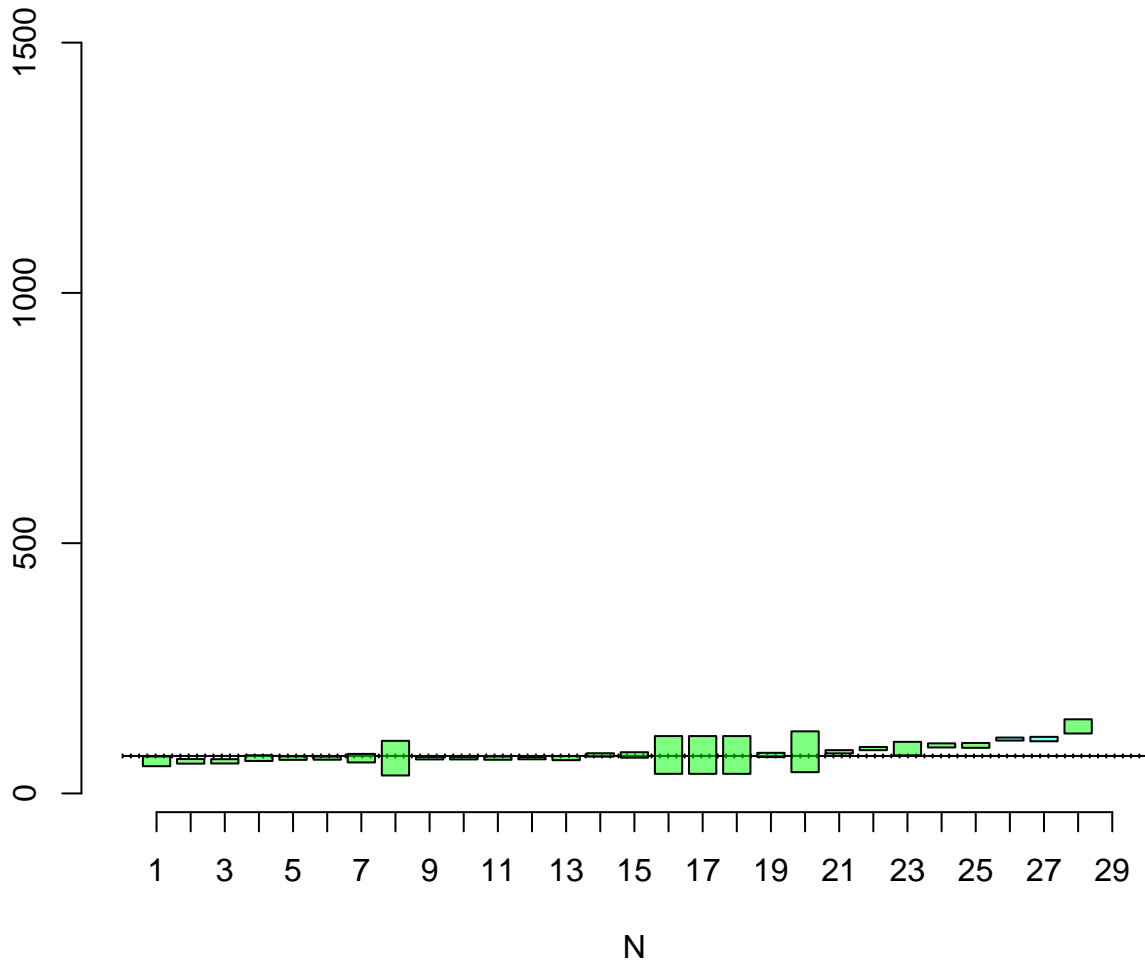

Sample 150

mean =  $274.16 \pm 1.43$  | 2.35 | 61.28 Ma (n=34/36)

MSWD = 642,  $p(\chi^2) = 0$

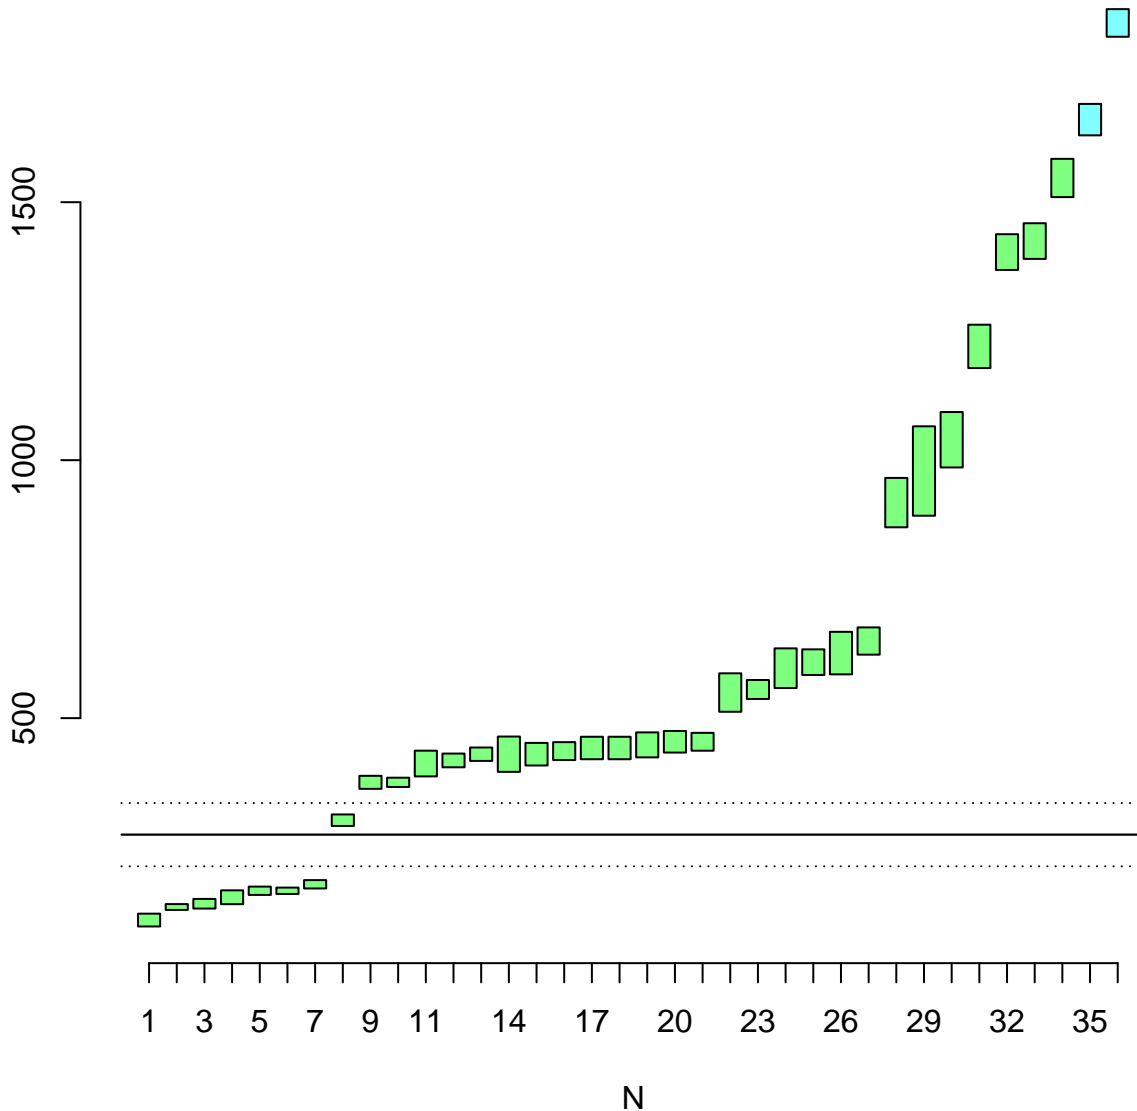



Sample 170

mean =  $74.48 \pm 0.65$  | 1.06 | 1.57 Ma (n=19/23)

MSWD = 1.96,  $p(\chi^2) = 0.0088$

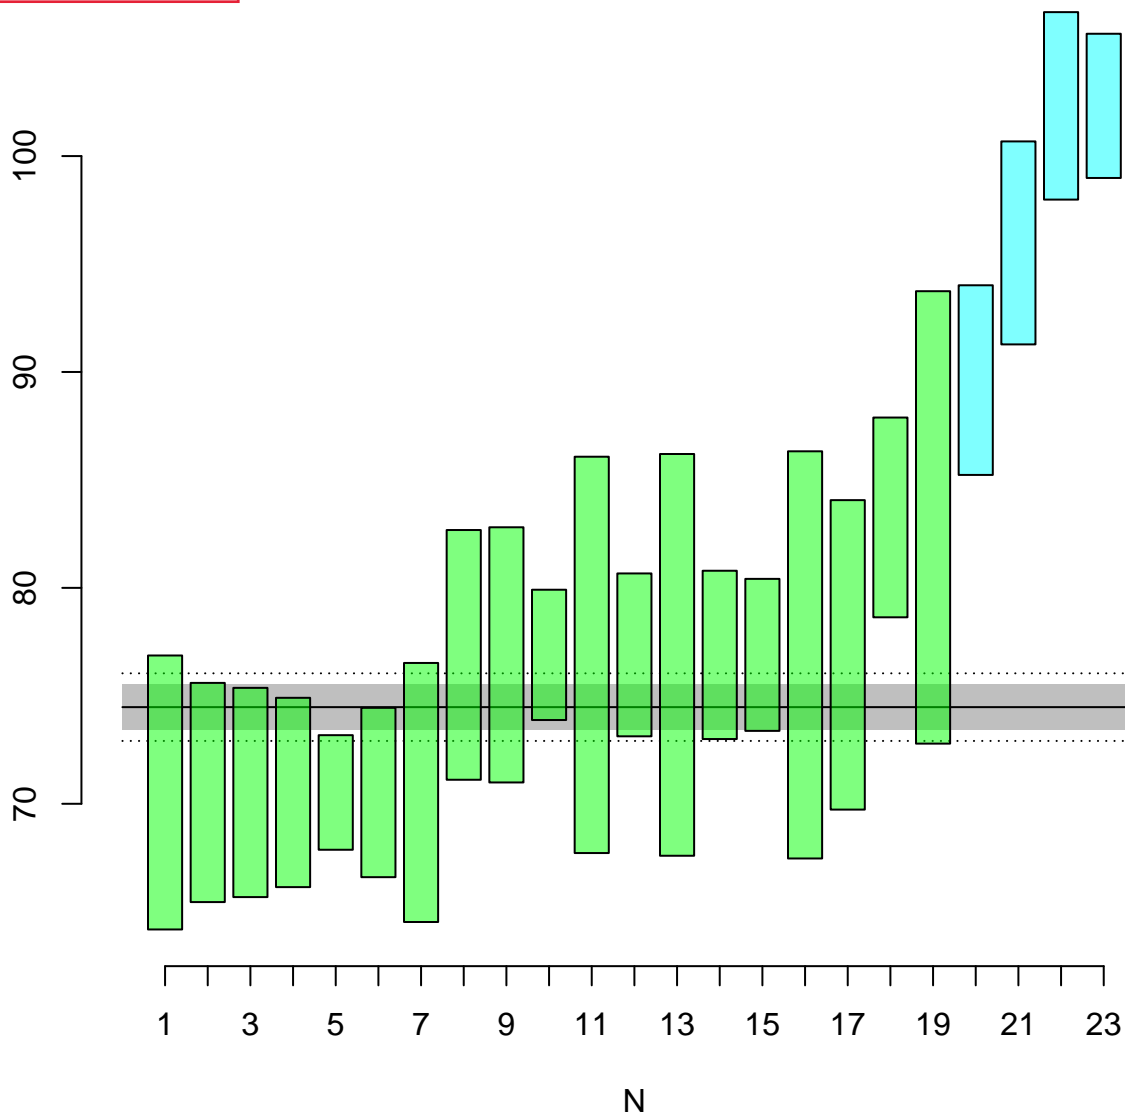

All Pierre

mean =  $81.09 \pm 0.16$  | 0.26 | 0.87 Ma (n=57/58)

MSWD = 11.4,  $p(\chi^2) = 0$

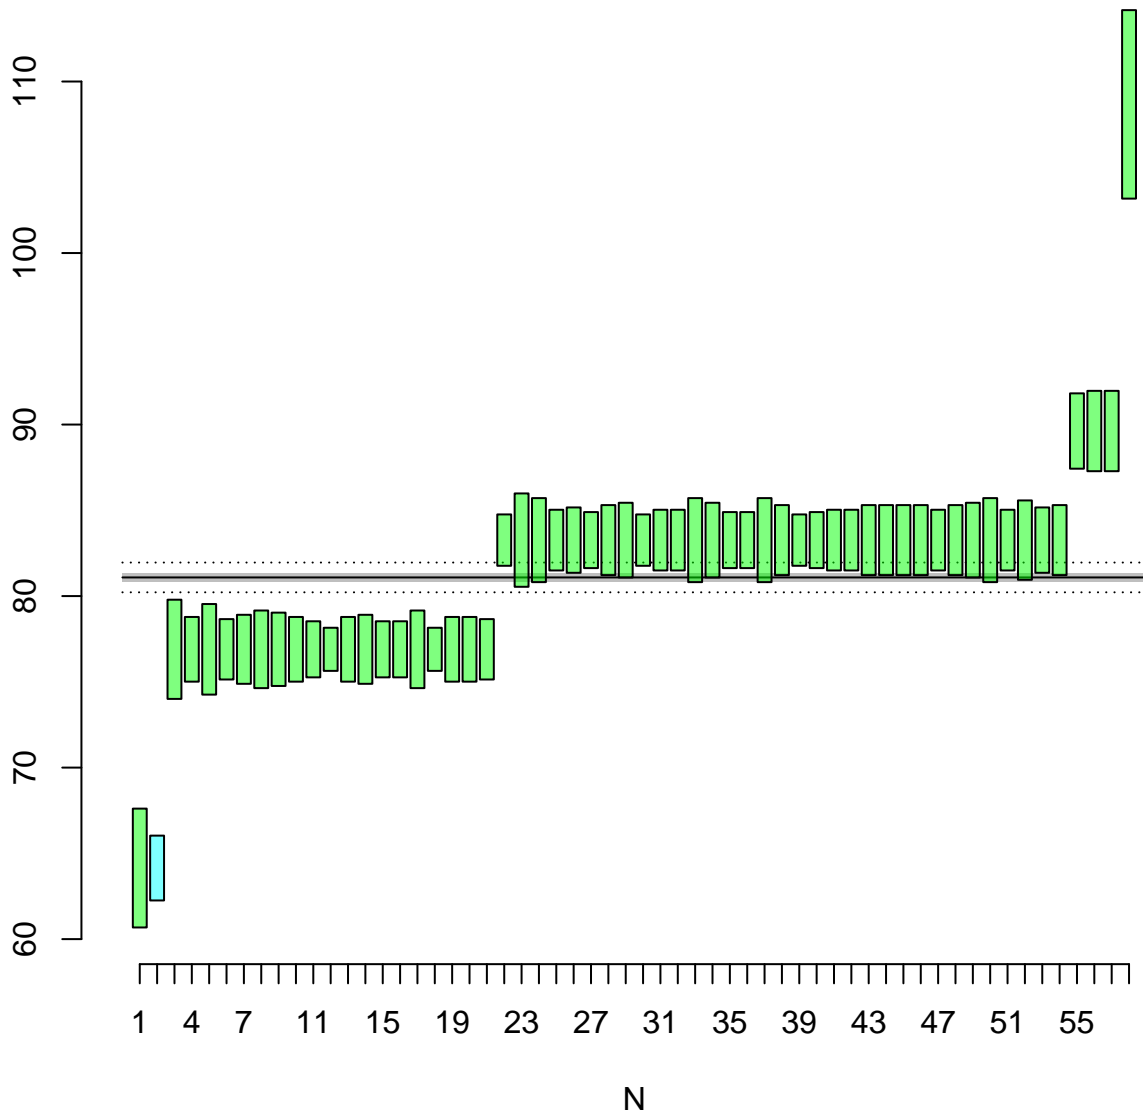

Supplement: s1 [file s1]
